# Supplementary material for: Intrinsic influence of selenium substitution in thiophene and benzo-2,1,3-thiadiazole on the electronic structure, excited states and photovoltaic performances evaluated using theoretical calculations
Source: Royal Society of Chemistry journal article supplement (doi:10.1039/d2nj04490k), 2022-12-09
Supplement: d2nj04490k1.pdf [file d2nj04490k1.pdf]

## Supplementary Information

### Intrinsic Influence of Selenium Substitution on Electronic Structure, Excited States and Photovoltaic Performances Evaluated by Theoretical Calculation

Mingwei Cao, Lei Wang\*, Huanhuan Gao, Hao Jiang, Haiyang Song\*

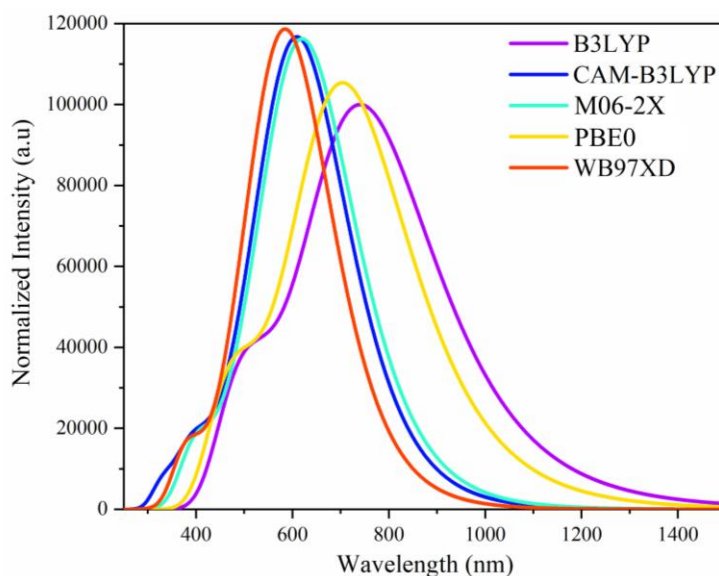

**Fig. S1** Theoretical observed absorption spectra of Y6 with B3LYP, CAM-B3LYP,  $\omega$ B97XD, PBE0 and M06-2X functionals.

**Table S1**

Experimental and calculated  $\lambda_{max}$  values of Y6 with B3LYP, CAM-B3LYP,  $\omega$ B97XD, PBE0 and M062X functionals in def2-TZVP level.

| Hybird functionals | Calc. $\lambda_{max}$ (nm) /Exp. $\lambda_{max}$ (nm) | Err. $\lambda_{max}$ (nm) |
|--------------------|-------------------------------------------------------|---------------------------|
| B3LYP              | 750.51/731                                            | 19.51                     |
| CAM-B3LYP          | 620.91                                                | 110.09                    |
| $\omega$ B97XD     | 597.37                                                | 133.63                    |
| PBE0               | 713.13                                                | 17.87                     |
| M06-2X             | 631.70                                                | 93.30                     |

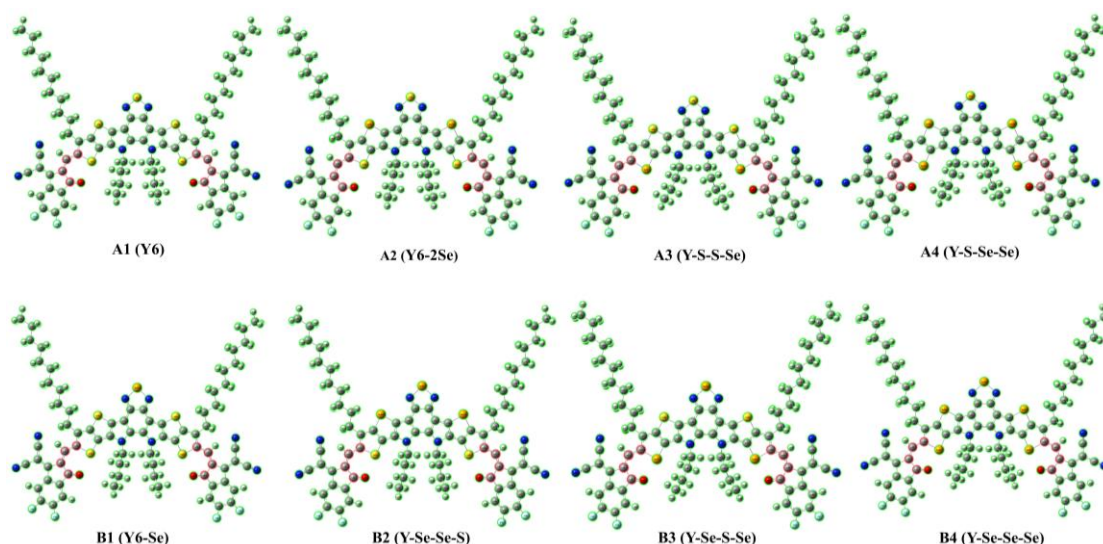

**Fig. S2** Optimized geometric structures atomic number marking of Y6 and its derivatives (red marks atoms associated with dihedral angles and green marks other atoms).

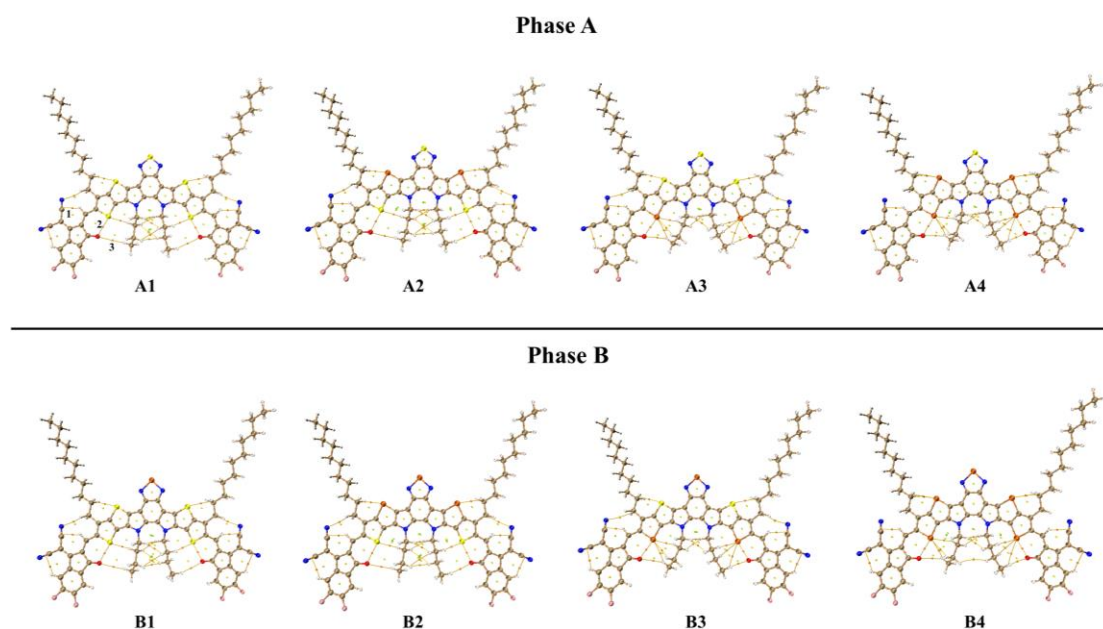

**Fig. S3** Topological analysis of the intramolecular bond critical point (3, -1) based on AIM theory for molecules Phase A and B.

**Table S2**

Lagrangian kinetic energy  $G(r)$ , Energy density  $E(r)$ , Potential energy density  $V(r)$ , Electron Density  $\rho$  and Laplacian of Electron Density  $\nabla^2\rho$  at the Intramolecular Bond Critical Point (3, -1) with the  $H\cdots\pi$ ,  $S\cdots O$ ,  $Se\cdots O$ , and Associated  $H\cdots H$  Interactions of molecules.

|         | A1           |             |             | A2           |             |             | A3           |              |             | A4           |              |             |
|---------|--------------|-------------|-------------|--------------|-------------|-------------|--------------|--------------|-------------|--------------|--------------|-------------|
|         | $H\cdots\pi$ | $S\cdots O$ | $H\cdots H$ | $H\cdots\pi$ | $S\cdots O$ | $H\cdots H$ | $H\cdots\pi$ | $Se\cdots O$ | $H\cdots H$ | $H\cdots\pi$ | $Se\cdots O$ | $H\cdots H$ |
| $G(r)$  | 0.013        | 0.019       | 0.009       | 0.013        | 0.019       | 0.009       | 0.013        | 0.025        | 0.008       | 0.013        | 0.024        | 0.009       |
| $E(r)$  | 0.002        | 0.001       | 0.002       | 0.002        | 0.001       | 0.002       | 0.002        | 0.000        | 0.002       | 0.002        | 0.000        | 0.002       |
| $-V(r)$ | 0.011        | 0.018       | 0.007       | 0.011        | 0.018       | 0.007       | 0.011        | 0.025        | 0.007       | 0.011        | 0.024        | 0.007       |
| $\rho$  | 0.018        | 0.023       | 0.012       | 0.019        | 0.024       | 0.012       | 0.019        | 0.031        | 0.011       | 0.019        | 0.031        | 0.011       |

| $\nabla^2\rho$ | 0.059         | 0.080        | 0.042        | 0.062         | 0.081        | 0.042        | 0.061         | 0.098         | 0.039        | 0.061         | 0.098         | 0.041        |
|----------------|---------------|--------------|--------------|---------------|--------------|--------------|---------------|---------------|--------------|---------------|---------------|--------------|
|                | B1            |              |              | B2            |              |              | B3            |               |              | B4            |               |              |
|                | H $\cdots\pi$ | S $\cdots$ O | H $\cdots$ H | H $\cdots\pi$ | S $\cdots$ O | H $\cdots$ H | H $\cdots\pi$ | Se $\cdots$ O | H $\cdots$ H | H $\cdots\pi$ | Se $\cdots$ O | H $\cdots$ H |
| G(r)           | 0.013         | 0.019        | 0.009        | 0.013         | 0.019        | 0.009        | 0.013         | 0.025         | 0.008        | 0.013         | 0.024         | 0.002        |
| E(r)           | 0.002         | 0.001        | 0.002        | 0.002         | 0.001        | 0.002        | 0.002         | 0.000         | 0.002        | 0.002         | 0.000         | 0.002        |
| -V(r)          | 0.011         | 0.018        | 0.007        | 0.011         | 0.018        | 0.008        | 0.011         | 0.024         | 0.007        | 0.011         | 0.024         | 0.008        |
| $\rho$         | 0.019         | 0.024        | 0.111        | 0.019         | 0.024        | 0.012        | 0.019         | 0.025         | 0.011        | 0.019         | 0.031         | 0.012        |
| $\nabla^2\rho$ | 0.062         | 0.081        | 0.041        | 0.062         | 0.080        | 0.042        | 0.061         | 0.098         | 0.039        | 0.061         | 0.098         | 0.042        |

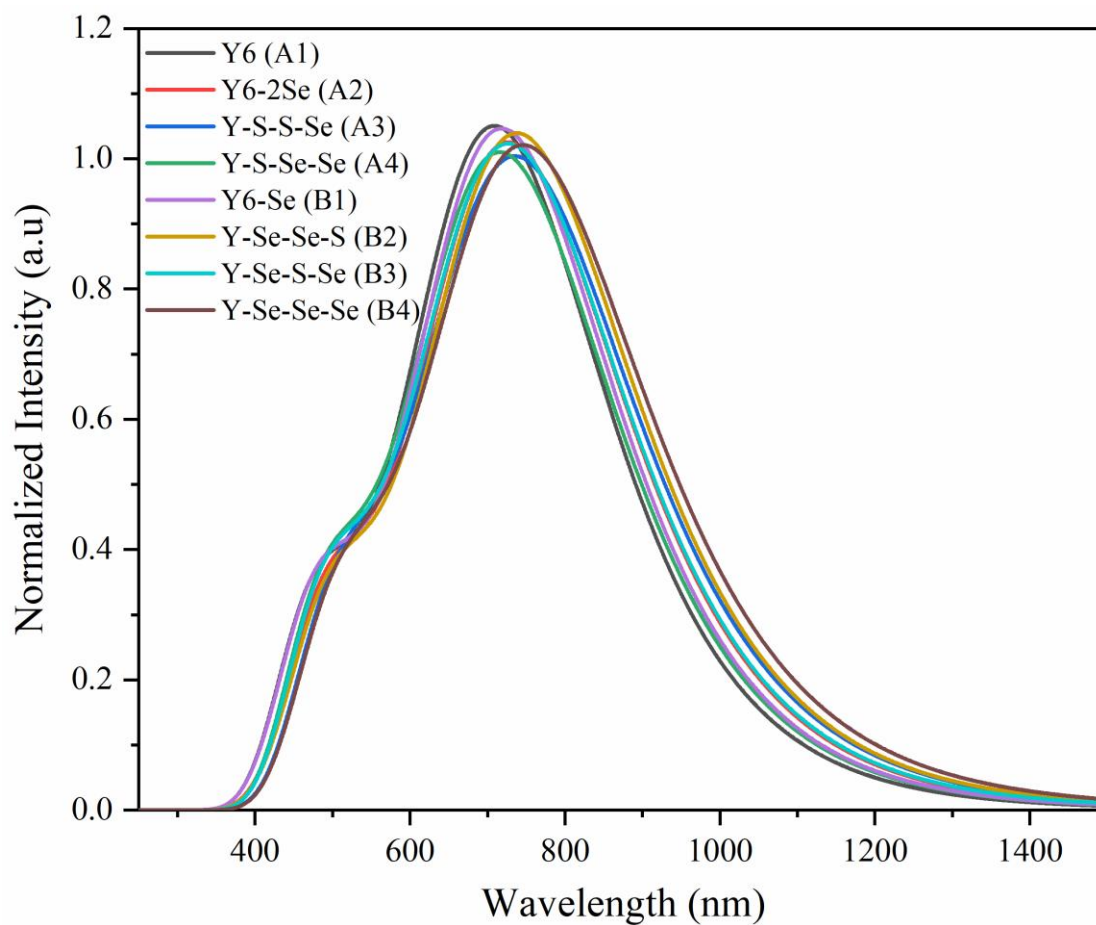

**Fig. S4** Simulated absorption spectra in the solvent(chloroform) of Y6 series molecules calculated at the PBE0 with def2-TZVP basis set.

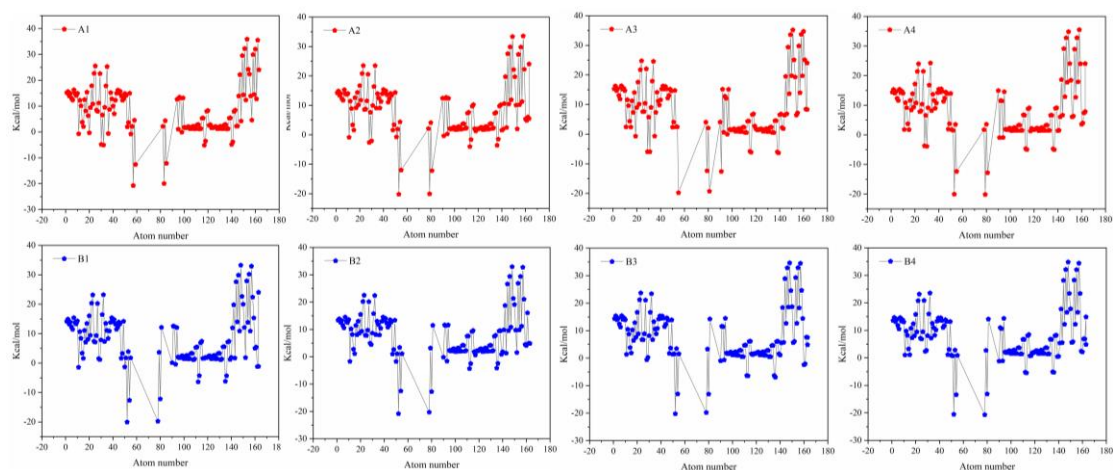

**Fig. S5** The averaged ESP values of the atoms in all molecules.

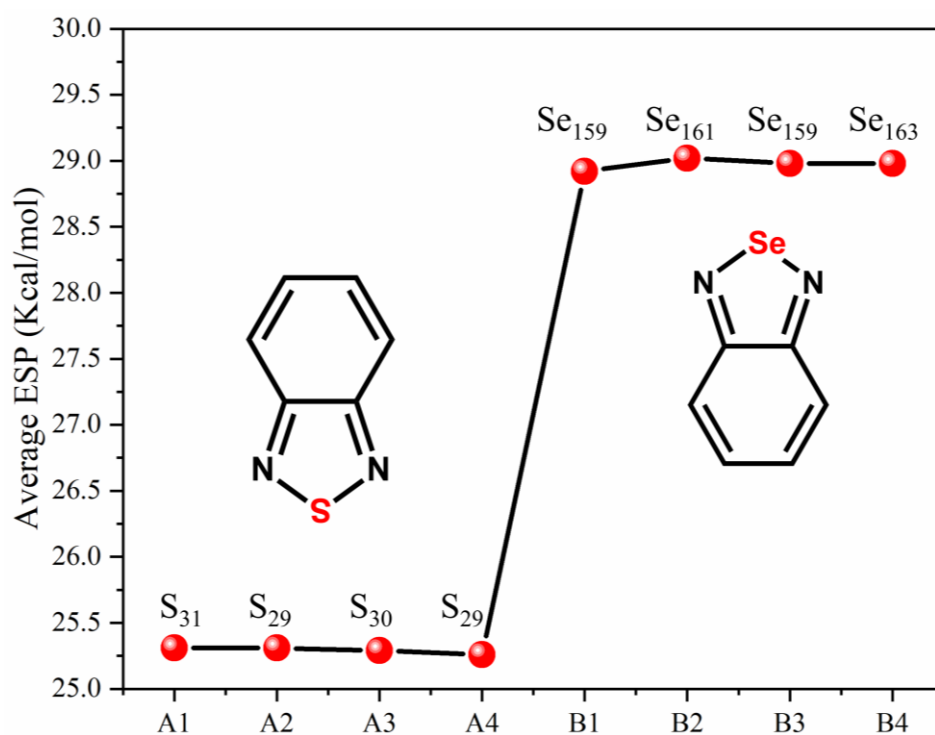

**Fig. S6** The average electrostatic potential values of the S position in Benzothiadiazole in series A and the position of Benzoselenadiazole Se in series B.

**Table S3**

Molecular surface area, molecular polarity index (MPI), extreme value of ESP and total average ESPs of Y6 series molecules (isosurface = 0.001 a.u.).

| Molecules                                       | A1      | A2      | A3      | A4      | B1      | B2      | B3      | B4      |
|-------------------------------------------------|---------|---------|---------|---------|---------|---------|---------|---------|
| Overall surface area/ $\text{\AA}^2$            | 1313.68 | 1304.50 | 1297.89 | 1301.40 | 1309.47 | 1309.15 | 1301.99 | 1306.46 |
| Molecular polarity index/kcal mol <sup>-1</sup> | 10.70   | 10.49   | 10.68   | 10.71   | 10.38   | 10.44   | 10.62   | 10.66   |
| Minimal value/kcal mol <sup>-1</sup>            | -39.15  | -39.15  | -38.83  | -39.33  | -39.13  | -39.64  | -39.34  | -39.80  |
| Maximal value/kcal mol <sup>-1</sup>            | 43.94   | 41.46   | 44.82   | 43.87   | 41.68   | 40.82   | 44.10   | 43.22   |
| Overall average value/kcal mol <sup>-1</sup>    | 5.42    | 5.57    | 5.53    | 5.74    | 5.19    | 5.41    | 5.38    | 5.60    |

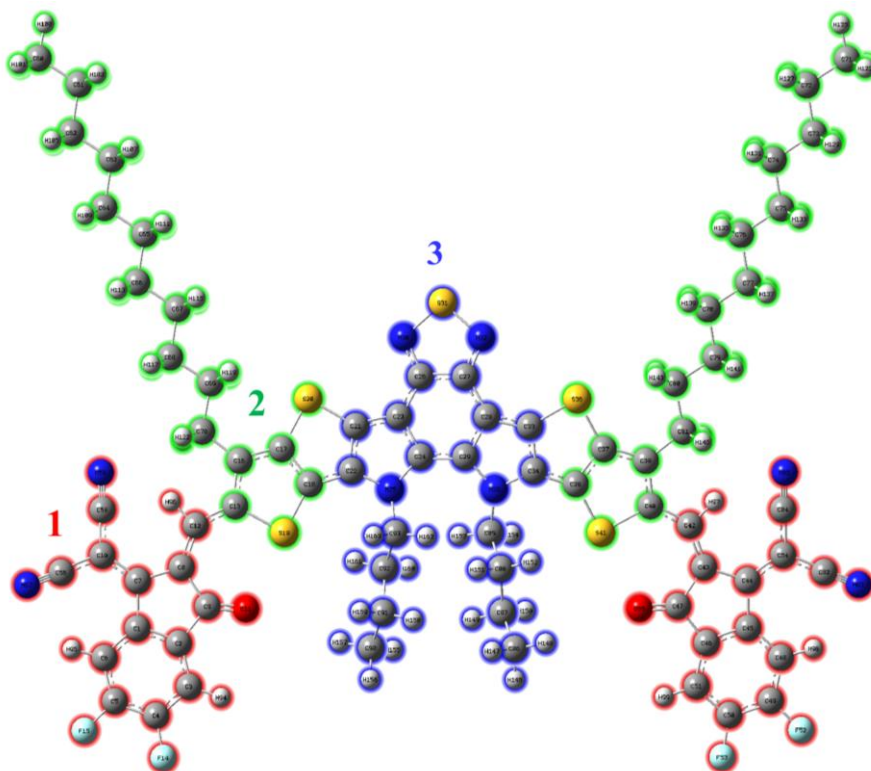

**Fig. S7** Three segments of Y6 and fragments 1, 2 and 3 are two end groups (A), two donor units (D) and acceptor center core (A') respectively.

**Table S4**

Percentage of charge transfer for different fragments, Intrinsic local excitation percentage and Intrinsic charge transfer percentage of the molecules.

| Molecules | 2->1(%) | 3->1(%) | 3->2(%) | CT (%)  | LE (%): |
|-----------|---------|---------|---------|---------|---------|
| A1        | 27.602% | 11.833% | 6.573%  | 61.486% | 33.417% |
| A2        | 28.075% | 11.557% | 6.409%  | 61.587% | 33.536% |
| A3        | 27.431% | 10.834% | 6.480%  | 60.566% | 33.659% |
| A4        | 27.823% | 10.513% | 6.348%  | 60.478% | 33.976% |
| B1        | 27.104% | 12.428% | 6.900%  | 61.902% | 33.039% |
| B2        | 27.430% | 12.138% | 6.733%  | 61.849% | 33.249% |
| B3        | 26.712% | 11.366% | 6.816%  | 60.777% | 33.423% |
| B4        | 27.108% | 11.073% | 6.690%  | 60.727% | 33.738% |

Below are the XYZ coordinates of the six molecules

Y6(A1)

|   |             |             |             |
|---|-------------|-------------|-------------|
| C | 9.49763200  | -5.17772900 | -0.63675600 |
| C | 8.14889800  | -5.56437200 | -0.63175700 |
| C | 7.74360700  | -6.88320200 | -0.74988300 |
| C | 8.73504200  | -7.84067300 | -0.87730500 |
| C | 10.08235900 | -7.47380800 | -0.88440100 |
| C | 10.48820000 | -6.15300700 | -0.76596000 |

|   |              |             |             |
|---|--------------|-------------|-------------|
| C | 9.56947500   | -3.70019000 | -0.49131900 |
| C | 8.20130100   | -3.20614300 | -0.39634300 |
| C | 7.29403100   | -4.36436000 | -0.48451400 |
| C | 10.75025100  | -2.98161600 | -0.45992800 |
| O | 6.07341300   | -4.36694700 | -0.44510000 |
| C | 7.82813400   | -1.88147200 | -0.24300000 |
| C | 6.60281000   | -1.20764100 | -0.13420900 |
| F | 8.41954700   | -9.13772900 | -0.99622300 |
| F | 11.00378400  | -8.43949300 | -1.01031600 |
| C | 6.54341700   | 0.20776800  | 0.02983700  |
| C | 5.18905632   | 0.72600588  | 0.11757742  |
| C | 4.26111800   | -0.37754800 | 0.02004700  |
| S | 4.98305900   | -1.93669500 | -0.17424700 |
| S | 4.43764168   | 2.31815512  | 0.29223558  |
| C | 2.77489000   | 1.45340900  | 0.21866200  |
| C | 2.92697200   | 0.06954200  | 0.09658300  |
| C | 1.40387200   | 1.73627600  | 0.16236000  |
| C | 0.71695900   | 0.48883800  | 0.03392600  |
| N | 1.67454000   | -0.52245800 | -0.01217200 |
| C | 0.71191100   | 2.98296800  | 0.11250700  |
| C | -0.71192300  | 2.98296900  | -0.11251100 |
| C | -1.40388300  | 1.73627900  | -0.16240100 |
| C | -0.71696300  | 0.48883700  | -0.03400200 |
| N | 1.24377500   | 4.19262900  | 0.19396800  |
| S | -0.00000800  | 5.27431000  | 0.00003000  |
| N | -1.24378700  | 4.19263200  | -0.19394200 |
| C | -2.77489900  | 1.45341000  | -0.21870700 |
| C | -2.92697800  | 0.06954200  | -0.09662200 |
| N | -1.67454600  | -0.52245000 | 0.01213600  |
| S | -4.46320186  | 2.26401952  | -0.28632999 |
| C | -5.16351514  | 0.78012848  | -0.12354201 |
| C | -4.26112200  | -0.37755300 | -0.02007900 |
| C | -6.54342000  | 0.20775500  | -0.02985300 |
| C | -6.60280700  | -1.20765500 | 0.13419400  |
| S | -4.98305300  | -1.93670600 | 0.17419800  |
| C | -7.82812800  | -1.88148800 | 0.24301200  |
| C | -8.20128900  | -3.20616000 | 0.39636700  |
| C | -9.56946100  | -3.70021100 | 0.49137300  |
| C | -9.49760900  | -5.17774800 | 0.63683000  |
| C | -8.14887300  | -5.56438500 | 0.63180900  |
| C | -7.29401600  | -4.36437600 | 0.48450900  |
| C | -10.48817000 | -6.15302800 | 0.76607700  |
| C | -10.08232000 | -7.47382500 | 0.88453800  |
| C | -8.73500200  | -7.84068400 | 0.87742300  |

|   |              |             |             |
|---|--------------|-------------|-------------|
| C | -7.74357300  | -6.88321100 | 0.74995900  |
| F | -11.00373800 | -8.43950900 | 1.01049500  |
| F | -8.41950000  | -9.13773600 | 0.99636200  |
| C | -10.75024000 | -2.98164000 | 0.46000500  |
| O | -6.07339600  | -4.36695400 | 0.44510900  |
| C | 12.03141300  | -3.59057600 | -0.56430000 |
| N | 13.08558300  | -4.05915200 | -0.64686400 |
| C | 10.82096900  | -1.56804600 | -0.32169700 |
| N | 10.91010600  | -0.41955600 | -0.20969200 |
| C | 13.80662500  | 12.25104700 | 1.14466200  |
| C | 12.45709900  | 11.53399500 | 1.10546700  |
| C | 12.58630100  | 10.01751600 | 0.94361400  |
| C | 11.24162700  | 9.28874500  | 0.90249100  |
| C | 11.37398400  | 7.77298100  | 0.74019000  |
| C | 10.02989600  | 7.04309700  | 0.69642200  |
| C | 10.16560600  | 5.52788200  | 0.53302300  |
| C | 8.82249300   | 4.79667600  | 0.48534700  |
| C | 8.96507100   | 3.28287000  | 0.31984300  |
| C | 7.61869000   | 2.55622000  | 0.26767400  |
| C | 7.79635200   | 1.04759000  | 0.09584100  |
| C | -13.80667700 | 12.25100900 | -1.14461500 |
| C | -12.45714600 | 11.53396200 | -1.10543700 |
| C | -12.58634100 | 10.01748400 | -0.94357400 |
| C | -11.24166400 | 9.28871800  | -0.90246700 |
| C | -11.37401100 | 7.77295500  | -0.74015500 |
| C | -10.02992100 | 7.04307600  | -0.69640400 |
| C | -10.16562300 | 5.52786100  | -0.53299400 |
| C | -8.82250800  | 4.79665900  | -0.48533900 |
| C | -8.96508200  | 3.28285400  | -0.31982300 |
| C | -7.61869900  | 2.55620400  | -0.26767800 |
| C | -7.79635800  | 1.04757600  | -0.09583400 |
| C | -12.03139700 | -3.59060000 | 0.56441200  |
| N | -13.08557000 | -4.05916300 | 0.64700600  |
| C | -10.82096100 | -1.56807100 | 0.32176300  |
| N | -10.91011300 | -0.41958300 | 0.20974100  |
| C | -2.26705800  | -5.44747300 | -0.92411300 |
| C | -1.95734100  | -4.36016500 | 0.10282600  |
| C | -1.83930500  | -2.97282400 | -0.53176900 |
| C | -1.54668900  | -1.89526500 | 0.51351900  |
| C | 2.26708100   | -5.44755400 | 0.92369700  |
| C | 1.95736800   | -4.36016700 | -0.10315900 |
| C | 1.83929500   | -2.97287900 | 0.53154800  |
| C | 1.54669000   | -1.89523900 | -0.51366000 |
| H | 6.69681300   | -7.15947500 | -0.74359700 |

|   |              |             |             |
|---|--------------|-------------|-------------|
| H | 11.54642900  | -5.94094600 | -0.77887100 |
| H | 8.65301100   | -1.18757900 | -0.19044200 |
| H | -8.65300700  | -1.18759900 | 0.19047000  |
| H | -11.54639900 | -5.94097200 | 0.77900800  |
| H | -6.69677800  | -7.15947900 | 0.74365500  |
| H | 13.68419500  | 13.33177500 | 1.26073100  |
| H | 14.37336500  | 12.07929300 | 0.22386400  |
| H | 14.41975300  | 11.89602800 | 1.97928900  |
| H | 11.85390800  | 11.93447900 | 0.28178200  |
| H | 11.90003000  | 11.75247100 | 2.02450100  |
| H | 13.14508800  | 9.79933500  | 0.02445500  |
| H | 13.19071600  | 9.61713700  | 1.76767700  |
| H | 10.63787700  | 9.68957800  | 0.07834900  |
| H | 10.68335300  | 9.50704500  | 1.82175900  |
| H | 11.93364800  | 7.55501700  | -0.17821200 |
| H | 11.97666800  | 7.37198600  | 1.56491400  |
| H | 9.42712100   | 7.44378600  | -0.12845700 |
| H | 9.46990200   | 7.25990200  | 1.61495200  |
| H | 10.72740700  | 5.31120300  | -0.38414600 |
| H | 10.76662600  | 5.12658800  | 1.35856800  |
| H | 8.22111000   | 5.19733000  | -0.34050400 |
| H | 8.26015100   | 5.01091300  | 1.40299400  |
| H | 9.52872100   | 3.06482200  | -0.59475700 |
| H | 9.56283800   | 2.87777500  | 1.14472300  |
| H | 7.03162100   | 2.96073000  | -0.56393500 |
| H | 7.06742500   | 2.76586200  | 1.19073600  |
| H | 8.42162700   | 0.67739400  | 0.91544700  |
| H | 8.38468400   | 0.86996400  | -0.81069200 |
| H | -14.41981600 | 11.89598300 | -1.97923000 |
| H | -14.37340000 | 12.07925900 | -0.22380600 |
| H | -13.68425300 | 13.33173700 | -1.26069400 |
| H | -11.85394400 | 11.93445400 | -0.28176500 |
| H | -11.90009400 | 11.75243500 | -2.02448100 |
| H | -13.14511100 | 9.79930700  | -0.02440500 |
| H | -13.19076800 | 9.61709800  | -1.76762300 |
| H | -10.63790100 | 9.68955900  | -0.07833700 |
| H | -10.68340400 | 9.50701500  | -1.82174500 |
| H | -11.93366100 | 7.55499500  | 0.17825800  |
| H | -11.97670800 | 7.37195300  | -1.56486600 |
| H | -9.42713500  | 7.44377100  | 0.12846200  |
| H | -9.46994200  | 7.25987700  | -1.61494500 |
| H | -10.72740800 | 5.31118600  | 0.38418700  |
| H | -10.76665800 | 5.12656100  | -1.35852600 |
| H | -8.22111200  | 5.19731800  | 0.34050000  |



|   |             |             |             |
|---|-------------|-------------|-------------|
| H | -8.26018300 | 5.01089200  | -1.40299600 |
| H | -9.52871300 | 3.06481000  | 0.59478800  |
| H | -9.56286400 | 2.87775400  | -1.14469000 |
| H | -7.03161400 | 2.96071900  | 0.56391900  |
| H | -7.06745000 | 2.76584300  | -1.19075100 |
| H | -8.38466900 | 0.86995200  | 0.81071200  |
| H | -8.42164900 | 0.67737700  | -0.91542500 |
| H | -2.33543000 | -6.42946000 | -0.44956000 |
| H | -1.49210900 | -5.50459900 | -1.69503300 |
| H | -3.22159600 | -5.25318000 | -1.42108000 |
| H | -1.02903000 | -4.60349500 | 0.63207900  |
| H | -2.74976100 | -4.34142500 | 0.85844700  |
| H | -1.06502600 | -2.97703500 | -1.30467200 |
| H | -2.77038500 | -2.73395800 | -1.05124300 |
| H | -0.55536800 | -2.00609200 | 0.94010200  |
| H | -2.24750000 | -1.99808700 | 1.34712900  |
| H | 1.49211100  | -5.50476500 | 1.69459100  |
| H | 2.33549000  | -6.42949900 | 0.44906100  |
| H | 3.22160100  | -5.25328300 | 1.42070500  |
| H | 1.02907300  | -4.60346800 | -0.63245300 |
| H | 2.74980400  | -4.34135100 | -0.85876000 |
| H | 1.06499300  | -2.97716500 | 1.30442800  |
| H | 2.77035500  | -2.73404600 | 1.05107100  |
| H | 0.55537300  | -2.00603600 | -0.94025500 |
| H | 2.24750900  | -1.99799600 | -1.34727400 |

Y-S-Se-S(A2)

|   |             |             |             |
|---|-------------|-------------|-------------|
| C | 9.49763200  | -5.17772900 | -0.63675600 |
| C | 8.14889800  | -5.56437200 | -0.63175700 |
| C | 7.74360700  | -6.88320200 | -0.74988300 |
| C | 8.73504200  | -7.84067300 | -0.87730500 |
| C | 10.08235900 | -7.47380800 | -0.88440100 |
| C | 10.48820000 | -6.15300700 | -0.76596000 |
| C | 9.56947500  | -3.70019000 | -0.49131900 |
| C | 8.20130100  | -3.20614300 | -0.39634300 |
| C | 7.29403100  | -4.36436000 | -0.48451400 |
| C | 10.75025100 | -2.98161600 | -0.45992800 |
| O | 6.07341300  | -4.36694700 | -0.44510000 |
| C | 7.82813400  | -1.88147200 | -0.24300000 |
| C | 6.60281000  | -1.20764100 | -0.13420900 |
| F | 8.41954700  | -9.13772900 | -0.99622300 |
| F | 11.00378400 | -8.43949300 | -1.01031600 |
| C | 6.54341700  | 0.20776800  | 0.02983700  |
| C | 5.18905632  | 0.72600588  | 0.11757742  |

|   |              |             |             |
|---|--------------|-------------|-------------|
| C | 4.26111800   | -0.37754800 | 0.02004700  |
| C | 2.77489000   | 1.45340900  | 0.21866200  |
| C | 2.92697200   | 0.06954200  | 0.09658300  |
| C | 1.40387200   | 1.73627600  | 0.16236000  |
| C | 0.71695900   | 0.48883800  | 0.03392600  |
| N | 1.67454000   | -0.52245800 | -0.01217200 |
| C | 0.71191100   | 2.98296800  | 0.11250700  |
| C | -0.71192300  | 2.98296900  | -0.11251100 |
| C | -1.40388300  | 1.73627900  | -0.16240100 |
| C | -0.71696300  | 0.48883700  | -0.03400200 |
| N | 1.24377500   | 4.19262900  | 0.19396800  |
| S | -0.00000800  | 5.27431000  | 0.00003000  |
| N | -1.24378700  | 4.19263200  | -0.19394200 |
| C | -2.77489900  | 1.45341000  | -0.21870700 |
| C | -2.92697800  | 0.06954200  | -0.09662200 |
| N | -1.67454600  | -0.52245000 | 0.01213600  |
| C | -5.16351514  | 0.78012848  | -0.12354201 |
| C | -4.26112200  | -0.37755300 | -0.02007900 |
| C | -6.54342000  | 0.20775500  | -0.02985300 |
| C | -6.60280700  | -1.20765500 | 0.13419400  |
| C | -7.82812800  | -1.88148800 | 0.24301200  |
| C | -8.20128900  | -3.20616000 | 0.39636700  |
| C | -9.56946100  | -3.70021100 | 0.49137300  |
| C | -9.49760900  | -5.17774800 | 0.63683000  |
| C | -8.14887300  | -5.56438500 | 0.63180900  |
| C | -7.29401600  | -4.36437600 | 0.48450900  |
| C | -10.48817000 | -6.15302800 | 0.76607700  |
| C | -10.08232000 | -7.47382500 | 0.88453800  |
| C | -8.73500200  | -7.84068400 | 0.87742300  |
| C | -7.74357300  | -6.88321100 | 0.74995900  |
| F | -11.00373800 | -8.43950900 | 1.01049500  |
| F | -8.41950000  | -9.13773600 | 0.99636200  |
| C | -10.75024000 | -2.98164000 | 0.46000500  |
| O | -6.07339600  | -4.36695400 | 0.44510900  |
| C | 12.03141300  | -3.59057600 | -0.56430000 |
| N | 13.08558300  | -4.05915200 | -0.64686400 |
| C | 10.82096900  | -1.56804600 | -0.32169700 |
| N | 10.91010600  | -0.41955600 | -0.20969200 |
| C | 13.80662500  | 12.25104700 | 1.14466200  |
| C | 12.45709900  | 11.53399500 | 1.10546700  |
| C | 12.58630100  | 10.01751600 | 0.94361400  |
| C | 11.24162700  | 9.28874500  | 0.90249100  |
| C | 11.37398400  | 7.77298100  | 0.74019000  |
| C | 10.02989600  | 7.04309700  | 0.69642200  |

|   |              |             |             |
|---|--------------|-------------|-------------|
| C | 10.16560600  | 5.52788200  | 0.53302300  |
| C | 8.82249300   | 4.79667600  | 0.48534700  |
| C | 8.96507100   | 3.28287000  | 0.31984300  |
| C | 7.61869000   | 2.55622000  | 0.26767400  |
| C | 7.79635200   | 1.04759000  | 0.09584100  |
| C | -13.80667700 | 12.25100900 | -1.14461500 |
| C | -12.45714600 | 11.53396200 | -1.10543700 |
| C | -12.58634100 | 10.01748400 | -0.94357400 |
| C | -11.24166400 | 9.28871800  | -0.90246700 |
| C | -11.37401100 | 7.77295500  | -0.74015500 |
| C | -10.02992100 | 7.04307600  | -0.69640400 |
| C | -10.16562300 | 5.52786100  | -0.53299400 |
| C | -8.82250800  | 4.79665900  | -0.48533900 |
| C | -8.96508200  | 3.28285400  | -0.31982300 |
| C | -7.61869900  | 2.55620400  | -0.26767800 |
| C | -7.79635800  | 1.04757600  | -0.09583400 |
| C | -12.03139700 | -3.59060000 | 0.56441200  |
| N | -13.08557000 | -4.05916300 | 0.64700600  |
| C | -10.82096100 | -1.56807100 | 0.32176300  |
| N | -10.91011300 | -0.41958300 | 0.20974100  |
| C | -2.26705800  | -5.44747300 | -0.92411300 |
| C | -1.95734100  | -4.36016500 | 0.10282600  |
| C | -1.83930500  | -2.97282400 | -0.53176900 |
| C | -1.54668900  | -1.89526500 | 0.51351900  |
| C | 2.26708100   | -5.44755400 | 0.92369700  |
| C | 1.95736800   | -4.36016700 | -0.10315900 |
| C | 1.83929500   | -2.97287900 | 0.53154800  |
| C | 1.54669000   | -1.89523900 | -0.51366000 |
| H | 6.69681300   | -7.15947500 | -0.74359700 |
| H | 11.54642900  | -5.94094600 | -0.77887100 |
| H | 8.65301100   | -1.18757900 | -0.19044200 |
| H | -8.65300700  | -1.18759900 | 0.19047000  |
| H | -11.54639900 | -5.94097200 | 0.77900800  |
| H | -6.69677800  | -7.15947900 | 0.74365500  |
| H | 13.68419500  | 13.33177500 | 1.26073100  |
| H | 14.37336500  | 12.07929300 | 0.22386400  |
| H | 14.41975300  | 11.89602800 | 1.97928900  |
| H | 11.85390800  | 11.93447900 | 0.28178200  |
| H | 11.90003000  | 11.75247100 | 2.02450100  |
| H | 13.14508800  | 9.79933500  | 0.02445500  |
| H | 13.19071600  | 9.61713700  | 1.76767700  |
| H | 10.63787700  | 9.68957800  | 0.07834900  |
| H | 10.68335300  | 9.50704500  | 1.82175900  |
| H | 11.93364800  | 7.55501700  | -0.17821200 |

|   |              |             |             |
|---|--------------|-------------|-------------|
| H | 11.97666800  | 7.37198600  | 1.56491400  |
| H | 9.42712100   | 7.44378600  | -0.12845700 |
| H | 9.46990200   | 7.25990200  | 1.61495200  |
| H | 10.72740700  | 5.31120300  | -0.38414600 |
| H | 10.76662600  | 5.12658800  | 1.35856800  |
| H | 8.22111000   | 5.19733000  | -0.34050400 |
| H | 8.26015100   | 5.01091300  | 1.40299400  |
| H | 9.52872100   | 3.06482200  | -0.59475700 |
| H | 9.56283800   | 2.87777500  | 1.14472300  |
| H | 7.03162100   | 2.96073000  | -0.56393500 |
| H | 7.06742500   | 2.76586200  | 1.19073600  |
| H | 8.42162700   | 0.67739400  | 0.91544700  |
| H | 8.38468400   | 0.86996400  | -0.81069200 |
| H | -14.41981600 | 11.89598300 | -1.97923000 |
| H | -14.37340000 | 12.07925900 | -0.22380600 |
| H | -13.68425300 | 13.33173700 | -1.26069400 |
| H | -11.85394400 | 11.93445400 | -0.28176500 |
| H | -11.90009400 | 11.75243500 | -2.02448100 |
| H | -13.14511100 | 9.79930700  | -0.02440500 |
| H | -13.19076800 | 9.61709800  | -1.76762300 |
| H | -10.63790100 | 9.68955900  | -0.07833700 |
| H | -10.68340400 | 9.50701500  | -1.82174500 |
| H | -11.93366100 | 7.55499500  | 0.17825800  |
| H | -11.97670800 | 7.37195300  | -1.56486600 |
| H | -9.42713500  | 7.44377100  | 0.12846200  |
| H | -9.46994200  | 7.25987700  | -1.61494500 |
| H | -10.72740800 | 5.31118600  | 0.38418700  |
| H | -10.76665800 | 5.12656100  | -1.35852600 |
| H | -8.22111200  | 5.19731800  | 0.34050000  |
| H | -8.26018300  | 5.01089200  | -1.40299600 |
| H | -9.52871300  | 3.06481000  | 0.59478800  |
| H | -9.56286400  | 2.87775400  | -1.14469000 |
| H | -7.03161400  | 2.96071900  | 0.56391900  |
| H | -7.06745000  | 2.76584300  | -1.19075100 |
| H | -8.38466900  | 0.86995200  | 0.81071200  |
| H | -8.42164900  | 0.67737700  | -0.91542500 |
| H | -2.33543000  | -6.42946000 | -0.44956000 |
| H | -1.49210900  | -5.50459900 | -1.69503300 |
| H | -3.22159600  | -5.25318000 | -1.42108000 |
| H | -1.02903000  | -4.60349500 | 0.63207900  |
| H | -2.74976100  | -4.34142500 | 0.85844700  |
| H | -1.06502600  | -2.97703500 | -1.30467200 |
| H | -2.77038500  | -2.73395800 | -1.05124300 |
| H | -0.55536800  | -2.00609200 | 0.94010200  |

|    |             |             |             |
|----|-------------|-------------|-------------|
| H  | -2.24750000 | -1.99808700 | 1.34712900  |
| H  | 1.49211100  | -5.50476500 | 1.69459100  |
| H  | 2.33549000  | -6.42949900 | 0.44906100  |
| H  | 3.22160100  | -5.25328300 | 1.42070500  |
| H  | 1.02907300  | -4.60346800 | -0.63245300 |
| H  | 2.74980400  | -4.34135100 | -0.85876000 |
| H  | 1.06499300  | -2.97716500 | 1.30442800  |
| H  | 2.77035500  | -2.73404600 | 1.05107100  |
| H  | 0.55537300  | -2.00603600 | -0.94025500 |
| H  | 2.24750900  | -1.99799600 | -1.34727400 |
| Se | -4.46320186 | 2.26401952  | -0.28632999 |
| Se | 4.43764168  | 2.31815512  | 0.29223558  |
| S  | -4.98305300 | -1.93670600 | 0.17419800  |
| S  | 4.98305900  | -1.93669500 | -0.17424700 |

Y-S-S-Se(A3)

|   |              |             |             |
|---|--------------|-------------|-------------|
| C | -9.86122900  | -4.91941100 | 0.70047100  |
| C | -8.53498700  | -5.38698500 | 0.74153000  |
| C | -8.21079200  | -6.72494600 | 0.91119500  |
| C | -9.26260500  | -7.61946600 | 1.04387000  |
| C | -10.58900100 | -7.17125400 | 1.00539300  |
| C | -10.91285200 | -5.83041700 | 0.83527600  |
| C | -9.83754100  | -3.44545800 | 0.50745000  |
| C | -8.43870800  | -3.04119100 | 0.43133000  |
| C | -7.61147900  | -4.24506700 | 0.57725900  |
| C | -10.96765000 | -2.64966200 | 0.42156600  |
| O | -6.38196100  | -4.31933000 | 0.57329100  |
| C | -7.96765500  | -1.74911200 | 0.25557700  |
| C | -6.68378300  | -1.19736400 | 0.15562900  |
| F | -9.03539400  | -8.92746000 | 1.21093500  |
| F | -11.56406200 | -8.07866900 | 1.13843200  |
| C | -6.50016500  | 0.20535800  | -0.02186100 |
| C | -5.14791200  | 0.57258800  | -0.09726600 |
| C | -4.21876600  | -0.49134800 | -0.00331600 |
| S | -4.33443600  | 2.15715600  | -0.27850300 |
| C | -2.78816800  | 1.35847600  | -0.20446600 |
| C | -2.89798300  | -0.03129500 | -0.07868600 |
| C | -1.41824600  | 1.68015600  | -0.15058600 |
| C | -0.71295100  | 0.44415000  | -0.02104400 |
| N | -1.63522200  | -0.59705800 | 0.03141600  |
| C | -0.71731900  | 2.92660500  | -0.10603600 |
| C | 0.71707700   | 2.92666400  | 0.10421300  |
| C | 1.41804900   | 1.68025000  | 0.14913500  |
| C | 0.71279900   | 0.44418700  | 0.02000500  |

|   |              |             |             |
|---|--------------|-------------|-------------|
| N | -1.25102200  | 4.13824300  | -0.18402900 |
| S | -0.00016300  | 5.21683700  | -0.00127500 |
| N | 1.25073700   | 4.13834500  | 0.18180600  |
| C | 2.78798200   | 1.35862500  | 0.20320400  |
| C | 2.89784700   | -0.03118000 | 0.07789700  |
| N | 1.63509300   | -0.59704500 | -0.03201200 |
| S | 4.33421200   | 2.15739700  | 0.27706900  |
| C | 5.14777200   | 0.57276800  | 0.09636600  |
| C | 4.21864800   | -0.49121200 | 0.00273000  |
| C | 6.50003300   | 0.20555600  | 0.02114300  |
| C | 6.68370600   | -1.19720300 | -0.15594700 |
| C | 7.96761700   | -1.74888800 | -0.25574300 |
| C | 8.43884100   | -3.04096100 | -0.43115700 |
| C | 9.83773200   | -3.44507000 | -0.50706700 |
| C | 9.86163100   | -4.91904400 | -0.69986900 |
| C | 8.53545900   | -5.38680400 | -0.74093800 |
| C | 7.61179000   | -4.24498900 | -0.57688100 |
| C | 10.91339100  | -5.82992100 | -0.83449100 |
| C | 10.58973600  | -7.17082500 | -1.00444400 |
| C | 9.26340400   | -7.61922600 | -1.04293000 |
| C | 8.21145900   | -6.72483300 | -0.91044100 |
| F | 11.56493000  | -8.07812200 | -1.13731500 |
| F | 9.03638300   | -8.92727600 | -1.20982200 |
| C | 10.96775200  | -2.64914600 | -0.42115300 |
| O | 6.38228000   | -4.31943900 | -0.57301100 |
| C | -12.29095400 | -3.17247800 | 0.51146800  |
| N | -13.37910700 | -3.58131300 | 0.58266500  |
| C | -10.93297000 | -1.23626600 | 0.23618800  |
| N | -10.92791100 | -0.08053200 | 0.08535000  |
| C | -13.05337300 | 12.62807000 | -1.50283300 |
| C | -11.75097900 | 11.83233200 | -1.41423000 |
| C | -11.97585300 | 10.33020500 | -1.22013600 |
| C | -10.67725300 | 9.52469400  | -1.13122700 |
| C | -10.90178300 | 8.02291900  | -0.93692700 |
| C | -9.60173100  | 7.21931000  | -0.85072000 |
| C | -9.82410700  | 5.71738600  | -0.65575300 |
| C | -8.52166800  | 4.91735200  | -0.57390500 |
| C | -8.74327100  | 3.41607600  | -0.37779700 |
| C | -7.43387000  | 2.62447300  | -0.30239000 |
| C | -7.69536300  | 1.13089400  | -0.10338000 |
| C | 13.05277100  | 12.62818500 | 1.50484900  |
| C | 11.75041400  | 11.83238900 | 1.41622800  |
| C | 11.97535200  | 10.33035100 | 1.22152200  |
| C | 10.67678800  | 9.52478400  | 1.13258500  |

|   |              |             |             |
|---|--------------|-------------|-------------|
| C | 10.90137900  | 8.02309700  | 0.93767200  |
| C | 9.60136300   | 7.21943400  | 0.85144100  |
| C | 9.82379500   | 5.71759800  | 0.65586600  |
| C | 8.52138900   | 4.91751100  | 0.57399800  |
| C | 8.74304100   | 3.41631900  | 0.37731000  |
| C | 7.43367000   | 2.62467100  | 0.30188800  |
| C | 7.69519600   | 1.13116600  | 0.10234900  |
| C | 12.29111200  | -3.17185400 | -0.51085000 |
| N | 13.37930800  | -3.58060000 | -0.58188400 |
| C | 10.93292300  | -1.23573700 | -0.23591300 |
| N | 10.92780100  | -0.07999000 | -0.08517900 |
| C | 3.10536400   | -5.29728800 | 0.40380600  |
| C | 2.40550600   | -4.30208000 | -0.52119500 |
| C | 1.89076700   | -3.07716900 | 0.24739800  |
| C | 1.49220600   | -1.91370500 | -0.67129100 |
| C | -3.10494600  | -5.29759700 | -0.40371600 |
| C | -2.40545000  | -4.30199300 | 0.52113700  |
| C | -1.89068100  | -3.07723600 | -0.24767900 |
| C | -1.49225500  | -1.91360800 | 0.67085200  |
| H | -7.18069200  | -7.06096600 | 0.93900900  |
| H | -11.95744500 | -5.55344200 | 0.81483700  |
| H | -8.73701300  | -0.99523300 | 0.17867400  |
| H | 8.73690000   | -0.99491200 | -0.17905100 |
| H | 11.95794300  | -5.55279000 | -0.81404100 |
| H | 7.18140700   | -7.06100200 | -0.93826200 |
| H | -12.86344900 | 13.69759700 | -1.64140400 |
| H | -13.65143700 | 12.51319500 | -0.59149100 |
| H | -13.66897500 | 12.28922900 | -2.34404300 |
| H | -11.14177600 | 12.21672100 | -0.58510800 |
| H | -11.15923300 | 11.99445400 | -2.32521200 |
| H | -12.56815600 | 10.16764200 | -0.30854700 |
| H | -12.58659100 | 9.94551200  | -2.04914300 |
| H | -10.06688500 | 9.91040400  | -0.30256100 |
| H | -10.08581500 | 9.68797000  | -2.04312900 |
| H | -11.49148100 | 7.85883400  | -0.02415800 |
| H | -11.51294900 | 7.63688100  | -1.76473500 |
| H | -8.99010900  | 7.60597500  | -0.02348600 |
| H | -9.01260300  | 7.38329400  | -1.76393700 |
| H | -10.41024400 | 5.55174400  | 0.25882000  |
| H | -10.43680100 | 5.32980000  | -1.48147700 |
| H | -7.90793200  | 5.30520400  | 0.25107100  |
| H | -7.93608100  | 5.08194600  | -1.48917000 |
| H | -9.32420400  | 3.24519100  | 0.53823800  |
| H | -9.35792600  | 3.02318100  | -1.19853500 |

|   |             |             |             |
|---|-------------|-------------|-------------|
| H | -6.82805900 | 3.01514900  | 0.52371900  |
| H | -6.86414500 | 2.78815700  | -1.22475800 |
| H | -8.34581400 | 0.78604500  | -0.91664800 |
| H | -8.29569100 | 1.00541300  | 0.80623200  |
| H | 13.66857700 | 12.28907400 | 2.34580100  |
| H | 13.65064800 | 12.51369200 | 0.59333600  |
| H | 12.86280200 | 13.69764800 | 1.64385900  |
| H | 11.14100700 | 12.21704600 | 0.58737900  |
| H | 11.15885200 | 11.99412800 | 2.32739600  |
| H | 12.56747200 | 10.16817200 | 0.30974600  |
| H | 12.58629200 | 9.94538900  | 2.05025500  |
| H | 10.06621700 | 9.91076400  | 0.30419500  |
| H | 10.08553400 | 9.68767600  | 2.04467500  |
| H | 11.49089400 | 7.85939500  | 0.02471600  |
| H | 11.51274700 | 7.63679000  | 1.76520500  |
| H | 8.98953800  | 7.60636800  | 0.02448200  |
| H | 9.01241900  | 7.38303700  | 1.76484500  |
| H | 10.40974800 | 5.55233300  | -0.25889400 |
| H | 10.43668900 | 5.32974300  | 1.48131500  |
| H | 7.90745600  | 5.30562400  | -0.25071000 |
| H | 7.93598200  | 5.08174000  | 1.48944400  |
| H | 9.32379800  | 3.24579700  | -0.53890500 |
| H | 9.35788500  | 3.02316600  | 1.19778300  |
| H | 6.82770400  | 3.01560300  | -0.52398600 |
| H | 6.86409100  | 2.78801000  | 1.22440700  |
| H | 8.29512500  | 1.00594400  | -0.80757400 |
| H | 8.34604600  | 0.78618600  | 0.91523000  |
| H | 3.45868500  | -6.17236600 | -0.14884800 |
| H | 2.44066700  | -5.64661200 | 1.20174900  |
| H | 3.97780600  | -4.82328400 | 0.86488200  |
| H | 1.57963900  | -4.78425600 | -1.05900700 |
| H | 3.12217700  | -3.97372400 | -1.28466500 |
| H | 1.05453500  | -3.36677500 | 0.89340700  |
| H | 2.67657900  | -2.73321200 | 0.92914000  |
| H | 0.47413300  | -2.00365500 | -1.04495100 |
| H | 2.14532400  | -1.90789700 | -1.55168600 |
| H | -2.43996300 | -5.64705700 | -1.20136000 |
| H | -3.45826800 | -6.17256900 | 0.14911500  |
| H | -3.97733900 | -4.82389200 | -0.86518800 |
| H | -1.57963300 | -4.78392500 | 1.05925500  |
| H | -3.12232300 | -3.97350000 | 1.28434700  |
| H | -1.05436600 | -3.36694100 | -0.89353600 |
| H | -2.67643000 | -2.73343500 | -0.92955600 |
| H | -0.47420900 | -2.00343400 | 1.04458300  |



|    |             |             |             |
|----|-------------|-------------|-------------|
| H  | -2.14542000 | -1.90772000 | 1.55121500  |
| Se | 5.03044600  | -2.15114200 | -0.21425400 |
| Se | -5.03048800 | -2.15123400 | 0.21420500  |

Y-S-Se-Se(A4)

|   |             |             |             |
|---|-------------|-------------|-------------|
| C | 9.49763200  | -5.17772900 | -0.63675600 |
| C | 8.14889800  | -5.56437200 | -0.63175700 |
| C | 7.74360700  | -6.88320200 | -0.74988300 |
| C | 8.73504200  | -7.84067300 | -0.87730500 |
| C | 10.08235900 | -7.47380800 | -0.88440100 |
| C | 10.48820000 | -6.15300700 | -0.76596000 |
| C | 9.56947500  | -3.70019000 | -0.49131900 |
| C | 8.20130100  | -3.20614300 | -0.39634300 |
| C | 7.29403100  | -4.36436000 | -0.48451400 |
| C | 10.75025100 | -2.98161600 | -0.45992800 |
| O | 6.07341300  | -4.36694700 | -0.44510000 |
| C | 7.82813400  | -1.88147200 | -0.24300000 |
| C | 6.60281000  | -1.20764100 | -0.13420900 |
| F | 8.41954700  | -9.13772900 | -0.99622300 |
| F | 11.00378400 | -8.43949300 | -1.01031600 |
| C | 6.54341700  | 0.20776800  | 0.02983700  |
| C | 5.18905632  | 0.72600588  | 0.11757742  |
| C | 4.26111800  | -0.37754800 | 0.02004700  |
| C | 2.77489000  | 1.45340900  | 0.21866200  |
| C | 2.92697200  | 0.06954200  | 0.09658300  |
| C | 1.40387200  | 1.73627600  | 0.16236000  |
| C | 0.71695900  | 0.48883800  | 0.03392600  |
| N | 1.67454000  | -0.52245800 | -0.01217200 |
| C | 0.71191100  | 2.98296800  | 0.11250700  |
| C | -0.71192300 | 2.98296900  | -0.11251100 |
| C | -1.40388300 | 1.73627900  | -0.16240100 |
| C | -0.71696300 | 0.48883700  | -0.03400200 |
| N | 1.24377500  | 4.19262900  | 0.19396800  |
| S | -0.00000800 | 5.27431000  | 0.00003000  |
| N | -1.24378700 | 4.19263200  | -0.19394200 |
| C | -2.77489900 | 1.45341000  | -0.21870700 |
| C | -2.92697800 | 0.06954200  | -0.09662200 |
| N | -1.67454600 | -0.52245000 | 0.01213600  |
| C | -5.16351514 | 0.78012848  | -0.12354201 |
| C | -4.26112200 | -0.37755300 | -0.02007900 |
| C | -6.54342000 | 0.20775500  | -0.02985300 |
| C | -6.60280700 | -1.20765500 | 0.13419400  |
| C | -7.82812800 | -1.88148800 | 0.24301200  |
| C | -8.20128900 | -3.20616000 | 0.39636700  |

|   |              |             |             |
|---|--------------|-------------|-------------|
| C | -9.56946100  | -3.70021100 | 0.49137300  |
| C | -9.49760900  | -5.17774800 | 0.63683000  |
| C | -8.14887300  | -5.56438500 | 0.63180900  |
| C | -7.29401600  | -4.36437600 | 0.48450900  |
| C | -10.48817000 | -6.15302800 | 0.76607700  |
| C | -10.08232000 | -7.47382500 | 0.88453800  |
| C | -8.73500200  | -7.84068400 | 0.87742300  |
| C | -7.74357300  | -6.88321100 | 0.74995900  |
| F | -11.00373800 | -8.43950900 | 1.01049500  |
| F | -8.41950000  | -9.13773600 | 0.99636200  |
| C | -10.75024000 | -2.98164000 | 0.46000500  |
| O | -6.07339600  | -4.36695400 | 0.44510900  |
| C | 12.03141300  | -3.59057600 | -0.56430000 |
| N | 13.08558300  | -4.05915200 | -0.64686400 |
| C | 10.82096900  | -1.56804600 | -0.32169700 |
| N | 10.91010600  | -0.41955600 | -0.20969200 |
| C | 13.80662500  | 12.25104700 | 1.14466200  |
| C | 12.45709900  | 11.53399500 | 1.10546700  |
| C | 12.58630100  | 10.01751600 | 0.94361400  |
| C | 11.24162700  | 9.28874500  | 0.90249100  |
| C | 11.37398400  | 7.77298100  | 0.74019000  |
| C | 10.02989600  | 7.04309700  | 0.69642200  |
| C | 10.16560600  | 5.52788200  | 0.53302300  |
| C | 8.82249300   | 4.79667600  | 0.48534700  |
| C | 8.96507100   | 3.28287000  | 0.31984300  |
| C | 7.61869000   | 2.55622000  | 0.26767400  |
| C | 7.79635200   | 1.04759000  | 0.09584100  |
| C | -13.80667700 | 12.25100900 | -1.14461500 |
| C | -12.45714600 | 11.53396200 | -1.10543700 |
| C | -12.58634100 | 10.01748400 | -0.94357400 |
| C | -11.24166400 | 9.28871800  | -0.90246700 |
| C | -11.37401100 | 7.77295500  | -0.74015500 |
| C | -10.02992100 | 7.04307600  | -0.69640400 |
| C | -10.16562300 | 5.52786100  | -0.53299400 |
| C | -8.82250800  | 4.79665900  | -0.48533900 |
| C | -8.96508200  | 3.28285400  | -0.31982300 |
| C | -7.61869900  | 2.55620400  | -0.26767800 |
| C | -7.79635800  | 1.04757600  | -0.09583400 |
| C | -12.03139700 | -3.59060000 | 0.56441200  |
| N | -13.08557000 | -4.05916300 | 0.64700600  |
| C | -10.82096100 | -1.56807100 | 0.32176300  |
| N | -10.91011300 | -0.41958300 | 0.20974100  |
| C | -2.26705800  | -5.44747300 | -0.92411300 |
| C | -1.95734100  | -4.36016500 | 0.10282600  |

|   |              |             |             |
|---|--------------|-------------|-------------|
| C | -1.83930500  | -2.97282400 | -0.53176900 |
| C | -1.54668900  | -1.89526500 | 0.51351900  |
| C | 2.26708100   | -5.44755400 | 0.92369700  |
| C | 1.95736800   | -4.36016700 | -0.10315900 |
| C | 1.83929500   | -2.97287900 | 0.53154800  |
| C | 1.54669000   | -1.89523900 | -0.51366000 |
| H | 6.69681300   | -7.15947500 | -0.74359700 |
| H | 11.54642900  | -5.94094600 | -0.77887100 |
| H | 8.65301100   | -1.18757900 | -0.19044200 |
| H | -8.65300700  | -1.18759900 | 0.19047000  |
| H | -11.54639900 | -5.94097200 | 0.77900800  |
| H | -6.69677800  | -7.15947900 | 0.74365500  |
| H | 13.68419500  | 13.33177500 | 1.26073100  |
| H | 14.37336500  | 12.07929300 | 0.22386400  |
| H | 14.41975300  | 11.89602800 | 1.97928900  |
| H | 11.85390800  | 11.93447900 | 0.28178200  |
| H | 11.90003000  | 11.75247100 | 2.02450100  |
| H | 13.14508800  | 9.79933500  | 0.02445500  |
| H | 13.19071600  | 9.61713700  | 1.76767700  |
| H | 10.63787700  | 9.68957800  | 0.07834900  |
| H | 10.68335300  | 9.50704500  | 1.82175900  |
| H | 11.93364800  | 7.55501700  | -0.17821200 |
| H | 11.97666800  | 7.37198600  | 1.56491400  |
| H | 9.42712100   | 7.44378600  | -0.12845700 |
| H | 9.46990200   | 7.25990200  | 1.61495200  |
| H | 10.72740700  | 5.31120300  | -0.38414600 |
| H | 10.76662600  | 5.12658800  | 1.35856800  |
| H | 8.22111000   | 5.19733000  | -0.34050400 |
| H | 8.26015100   | 5.01091300  | 1.40299400  |
| H | 9.52872100   | 3.06482200  | -0.59475700 |
| H | 9.56283800   | 2.87777500  | 1.14472300  |
| H | 7.03162100   | 2.96073000  | -0.56393500 |
| H | 7.06742500   | 2.76586200  | 1.19073600  |
| H | 8.42162700   | 0.67739400  | 0.91544700  |
| H | 8.38468400   | 0.86996400  | -0.81069200 |
| H | -14.41981600 | 11.89598300 | -1.97923000 |
| H | -14.37340000 | 12.07925900 | -0.22380600 |
| H | -13.68425300 | 13.33173700 | -1.26069400 |
| H | -11.85394400 | 11.93445400 | -0.28176500 |
| H | -11.90009400 | 11.75243500 | -2.02448100 |
| H | -13.14511100 | 9.79930700  | -0.02440500 |
| H | -13.19076800 | 9.61709800  | -1.76762300 |
| H | -10.63790100 | 9.68955900  | -0.07833700 |
| H | -10.68340400 | 9.50701500  | -1.82174500 |

|    |              |             |             |
|----|--------------|-------------|-------------|
| H  | -11.93366100 | 7.55499500  | 0.17825800  |
| H  | -11.97670800 | 7.37195300  | -1.56486600 |
| H  | -9.42713500  | 7.44377100  | 0.12846200  |
| H  | -9.46994200  | 7.25987700  | -1.61494500 |
| H  | -10.72740800 | 5.31118600  | 0.38418700  |
| H  | -10.76665800 | 5.12656100  | -1.35852600 |
| H  | -8.22111200  | 5.19731800  | 0.34050000  |
| H  | -8.26018300  | 5.01089200  | -1.40299600 |
| H  | -9.52871300  | 3.06481000  | 0.59478800  |
| H  | -9.56286400  | 2.87775400  | -1.14469000 |
| H  | -7.03161400  | 2.96071900  | 0.56391900  |
| H  | -7.06745000  | 2.76584300  | -1.19075100 |
| H  | -8.38466900  | 0.86995200  | 0.81071200  |
| H  | -8.42164900  | 0.67737700  | -0.91542500 |
| H  | -2.33543000  | -6.42946000 | -0.44956000 |
| H  | -1.49210900  | -5.50459900 | -1.69503300 |
| H  | -3.22159600  | -5.25318000 | -1.42108000 |
| H  | -1.02903000  | -4.60349500 | 0.63207900  |
| H  | -2.74976100  | -4.34142500 | 0.85844700  |
| H  | -1.06502600  | -2.97703500 | -1.30467200 |
| H  | -2.77038500  | -2.73395800 | -1.05124300 |
| H  | -0.55536800  | -2.00609200 | 0.94010200  |
| H  | -2.24750000  | -1.99808700 | 1.34712900  |
| H  | 1.49211100   | -5.50476500 | 1.69459100  |
| H  | 2.33549000   | -6.42949900 | 0.44906100  |
| H  | 3.22160100   | -5.25328300 | 1.42070500  |
| H  | 1.02907300   | -4.60346800 | -0.63245300 |
| H  | 2.74980400   | -4.34135100 | -0.85876000 |
| H  | 1.06499300   | -2.97716500 | 1.30442800  |
| H  | 2.77035500   | -2.73404600 | 1.05107100  |
| H  | 0.55537300   | -2.00603600 | -0.94025500 |
| H  | 2.24750900   | -1.99799600 | -1.34727400 |
| Se | -4.46320186  | 2.26401952  | -0.28632999 |
| Se | 4.43764168   | 2.31815512  | 0.29223558  |
| Se | -4.98305300  | -1.93670600 | 0.17419800  |
| Se | 4.98305900   | -1.93669500 | -0.17424700 |

Y6-Se(B1)

|   |             |             |             |
|---|-------------|-------------|-------------|
| C | 9.49763200  | -5.17772900 | -0.63675600 |
| C | 8.14889800  | -5.56437200 | -0.63175700 |
| C | 7.74360700  | -6.88320200 | -0.74988300 |
| C | 8.73504200  | -7.84067300 | -0.87730500 |
| C | 10.08235900 | -7.47380800 | -0.88440100 |
| C | 10.48820000 | -6.15300700 | -0.76596000 |

|   |              |             |             |
|---|--------------|-------------|-------------|
| C | 9.56947500   | -3.70019000 | -0.49131900 |
| C | 8.20130100   | -3.20614300 | -0.39634300 |
| C | 7.29403100   | -4.36436000 | -0.48451400 |
| C | 10.75025100  | -2.98161600 | -0.45992800 |
| O | 6.07341300   | -4.36694700 | -0.44510000 |
| C | 7.82813400   | -1.88147200 | -0.24300000 |
| C | 6.60281000   | -1.20764100 | -0.13420900 |
| F | 8.41954700   | -9.13772900 | -0.99622300 |
| F | 11.00378400  | -8.43949300 | -1.01031600 |
| C | 6.54341700   | 0.20776800  | 0.02983700  |
| C | 5.18905632   | 0.72600588  | 0.11757742  |
| C | 4.26111800   | -0.37754800 | 0.02004700  |
| C | 2.77489000   | 1.45340900  | 0.21866200  |
| C | 2.92697200   | 0.06954200  | 0.09658300  |
| C | 1.40387200   | 1.73627600  | 0.16236000  |
| C | 0.71695900   | 0.48883800  | 0.03392600  |
| N | 1.67454000   | -0.52245800 | -0.01217200 |
| C | 0.71191100   | 2.98296800  | 0.11250700  |
| C | -0.71192300  | 2.98296900  | -0.11251100 |
| C | -1.40388300  | 1.73627900  | -0.16240100 |
| C | -0.71696300  | 0.48883700  | -0.03400200 |
| N | 1.24377500   | 4.19262900  | 0.19396800  |
| N | -1.24378700  | 4.19263200  | -0.19394200 |
| C | -2.77489900  | 1.45341000  | -0.21870700 |
| C | -2.92697800  | 0.06954200  | -0.09662200 |
| N | -1.67454600  | -0.52245000 | 0.01213600  |
| C | -5.16351514  | 0.78012848  | -0.12354201 |
| C | -4.26112200  | -0.37755300 | -0.02007900 |
| C | -6.54342000  | 0.20775500  | -0.02985300 |
| C | -6.60280700  | -1.20765500 | 0.13419400  |
| C | -7.82812800  | -1.88148800 | 0.24301200  |
| C | -8.20128900  | -3.20616000 | 0.39636700  |
| C | -9.56946100  | -3.70021100 | 0.49137300  |
| C | -9.49760900  | -5.17774800 | 0.63683000  |
| C | -8.14887300  | -5.56438500 | 0.63180900  |
| C | -7.29401600  | -4.36437600 | 0.48450900  |
| C | -10.48817000 | -6.15302800 | 0.76607700  |
| C | -10.08232000 | -7.47382500 | 0.88453800  |
| C | -8.73500200  | -7.84068400 | 0.87742300  |
| C | -7.74357300  | -6.88321100 | 0.74995900  |
| F | -11.00373800 | -8.43950900 | 1.01049500  |
| F | -8.41950000  | -9.13773600 | 0.99636200  |
| C | -10.75024000 | -2.98164000 | 0.46000500  |
| O | -6.07339600  | -4.36695400 | 0.44510900  |

|   |              |             |             |
|---|--------------|-------------|-------------|
| C | 12.03141300  | -3.59057600 | -0.56430000 |
| N | 13.08558300  | -4.05915200 | -0.64686400 |
| C | 10.82096900  | -1.56804600 | -0.32169700 |
| N | 10.91010600  | -0.41955600 | -0.20969200 |
| C | 13.80662500  | 12.25104700 | 1.14466200  |
| C | 12.45709900  | 11.53399500 | 1.10546700  |
| C | 12.58630100  | 10.01751600 | 0.94361400  |
| C | 11.24162700  | 9.28874500  | 0.90249100  |
| C | 11.37398400  | 7.77298100  | 0.74019000  |
| C | 10.02989600  | 7.04309700  | 0.69642200  |
| C | 10.16560600  | 5.52788200  | 0.53302300  |
| C | 8.82249300   | 4.79667600  | 0.48534700  |
| C | 8.96507100   | 3.28287000  | 0.31984300  |
| C | 7.61869000   | 2.55622000  | 0.26767400  |
| C | 7.79635200   | 1.04759000  | 0.09584100  |
| C | -13.80667700 | 12.25100900 | -1.14461500 |
| C | -12.45714600 | 11.53396200 | -1.10543700 |
| C | -12.58634100 | 10.01748400 | -0.94357400 |
| C | -11.24166400 | 9.28871800  | -0.90246700 |
| C | -11.37401100 | 7.77295500  | -0.74015500 |
| C | -10.02992100 | 7.04307600  | -0.69640400 |
| C | -10.16562300 | 5.52786100  | -0.53299400 |
| C | -8.82250800  | 4.79665900  | -0.48533900 |
| C | -8.96508200  | 3.28285400  | -0.31982300 |
| C | -7.61869900  | 2.55620400  | -0.26767800 |
| C | -7.79635800  | 1.04757600  | -0.09583400 |
| C | -12.03139700 | -3.59060000 | 0.56441200  |
| N | -13.08557000 | -4.05916300 | 0.64700600  |
| C | -10.82096100 | -1.56807100 | 0.32176300  |
| N | -10.91011300 | -0.41958300 | 0.20974100  |
| C | -2.26705800  | -5.44747300 | -0.92411300 |
| C | -1.95734100  | -4.36016500 | 0.10282600  |
| C | -1.83930500  | -2.97282400 | -0.53176900 |
| C | -1.54668900  | -1.89526500 | 0.51351900  |
| C | 2.26708100   | -5.44755400 | 0.92369700  |
| C | 1.95736800   | -4.36016700 | -0.10315900 |
| C | 1.83929500   | -2.97287900 | 0.53154800  |
| C | 1.54669000   | -1.89523900 | -0.51366000 |
| H | 6.69681300   | -7.15947500 | -0.74359700 |
| H | 11.54642900  | -5.94094600 | -0.77887100 |
| H | 8.65301100   | -1.18757900 | -0.19044200 |
| H | -8.65300700  | -1.18759900 | 0.19047000  |
| H | -11.54639900 | -5.94097200 | 0.77900800  |
| H | -6.69677800  | -7.15947900 | 0.74365500  |

|   |              |             |             |
|---|--------------|-------------|-------------|
| H | 13.68419500  | 13.33177500 | 1.26073100  |
| H | 14.37336500  | 12.07929300 | 0.22386400  |
| H | 14.41975300  | 11.89602800 | 1.97928900  |
| H | 11.85390800  | 11.93447900 | 0.28178200  |
| H | 11.90003000  | 11.75247100 | 2.02450100  |
| H | 13.14508800  | 9.79933500  | 0.02445500  |
| H | 13.19071600  | 9.61713700  | 1.76767700  |
| H | 10.63787700  | 9.68957800  | 0.07834900  |
| H | 10.68335300  | 9.50704500  | 1.82175900  |
| H | 11.93364800  | 7.55501700  | -0.17821200 |
| H | 11.97666800  | 7.37198600  | 1.56491400  |
| H | 9.42712100   | 7.44378600  | -0.12845700 |
| H | 9.46990200   | 7.25990200  | 1.61495200  |
| H | 10.72740700  | 5.31120300  | -0.38414600 |
| H | 10.76662600  | 5.12658800  | 1.35856800  |
| H | 8.22111000   | 5.19733000  | -0.34050400 |
| H | 8.26015100   | 5.01091300  | 1.40299400  |
| H | 9.52872100   | 3.06482200  | -0.59475700 |
| H | 9.56283800   | 2.87777500  | 1.14472300  |
| H | 7.03162100   | 2.96073000  | -0.56393500 |
| H | 7.06742500   | 2.76586200  | 1.19073600  |
| H | 8.42162700   | 0.67739400  | 0.91544700  |
| H | 8.38468400   | 0.86996400  | -0.81069200 |
| H | -14.41981600 | 11.89598300 | -1.97923000 |
| H | -14.37340000 | 12.07925900 | -0.22380600 |
| H | -13.68425300 | 13.33173700 | -1.26069400 |
| H | -11.85394400 | 11.93445400 | -0.28176500 |
| H | -11.90009400 | 11.75243500 | -2.02448100 |
| H | -13.14511100 | 9.79930700  | -0.02440500 |
| H | -13.19076800 | 9.61709800  | -1.76762300 |
| H | -10.63790100 | 9.68955900  | -0.07833700 |
| H | -10.68340400 | 9.50701500  | -1.82174500 |
| H | -11.93366100 | 7.55499500  | 0.17825800  |
| H | -11.97670800 | 7.37195300  | -1.56486600 |
| H | -9.42713500  | 7.44377100  | 0.12846200  |
| H | -9.46994200  | 7.25987700  | -1.61494500 |
| H | -10.72740800 | 5.31118600  | 0.38418700  |
| H | -10.76665800 | 5.12656100  | -1.35852600 |
| H | -8.22111200  | 5.19731800  | 0.34050000  |
| H | -8.26018300  | 5.01089200  | -1.40299600 |
| H | -9.52871300  | 3.06481000  | 0.59478800  |
| H | -9.56286400  | 2.87775400  | -1.14469000 |
| H | -7.03161400  | 2.96071900  | 0.56391900  |
| H | -7.06745000  | 2.76584300  | -1.19075100 |

|    |             |             |             |
|----|-------------|-------------|-------------|
| H  | -8.38466900 | 0.86995200  | 0.81071200  |
| H  | -8.42164900 | 0.67737700  | -0.91542500 |
| H  | -2.33543000 | -6.42946000 | -0.44956000 |
| H  | -1.49210900 | -5.50459900 | -1.69503300 |
| H  | -3.22159600 | -5.25318000 | -1.42108000 |
| H  | -1.02903000 | -4.60349500 | 0.63207900  |
| H  | -2.74976100 | -4.34142500 | 0.85844700  |
| H  | -1.06502600 | -2.97703500 | -1.30467200 |
| H  | -2.77038500 | -2.73395800 | -1.05124300 |
| H  | -0.55536800 | -2.00609200 | 0.94010200  |
| H  | -2.24750000 | -1.99808700 | 1.34712900  |
| H  | 1.49211100  | -5.50476500 | 1.69459100  |
| H  | 2.33549000  | -6.42949900 | 0.44906100  |
| H  | 3.22160100  | -5.25328300 | 1.42070500  |
| H  | 1.02907300  | -4.60346800 | -0.63245300 |
| H  | 2.74980400  | -4.34135100 | -0.85876000 |
| H  | 1.06499300  | -2.97716500 | 1.30442800  |
| H  | 2.77035500  | -2.73404600 | 1.05107100  |
| H  | 0.55537300  | -2.00603600 | -0.94025500 |
| H  | 2.24750900  | -1.99799600 | -1.34727400 |
| Se | -0.00000800 | 5.27431000  | 0.00003000  |
| S  | -4.98305300 | -1.93670600 | 0.17419800  |
| S  | 4.98305900  | -1.93669500 | -0.17424700 |
| S  | -4.46320186 | 2.26401952  | -0.28632999 |
| S  | 4.43764168  | 2.31815512  | 0.29223558  |

Y6-Se-Se-S(B2)

|   |             |             |             |
|---|-------------|-------------|-------------|
| C | 9.49763200  | -5.17772900 | -0.63675600 |
| C | 8.14889800  | -5.56437200 | -0.63175700 |
| C | 7.74360700  | -6.88320200 | -0.74988300 |
| C | 8.73504200  | -7.84067300 | -0.87730500 |
| C | 10.08235900 | -7.47380800 | -0.88440100 |
| C | 10.48820000 | -6.15300700 | -0.76596000 |
| C | 9.56947500  | -3.70019000 | -0.49131900 |
| C | 8.20130100  | -3.20614300 | -0.39634300 |
| C | 7.29403100  | -4.36436000 | -0.48451400 |
| C | 10.75025100 | -2.98161600 | -0.45992800 |
| O | 6.07341300  | -4.36694700 | -0.44510000 |
| C | 7.82813400  | -1.88147200 | -0.24300000 |
| C | 6.60281000  | -1.20764100 | -0.13420900 |
| F | 8.41954700  | -9.13772900 | -0.99622300 |
| F | 11.00378400 | -8.43949300 | -1.01031600 |
| C | 6.54341700  | 0.20776800  | 0.02983700  |
| C | 5.18905632  | 0.72600588  | 0.11757742  |



|   |              |             |             |
|---|--------------|-------------|-------------|
| C | 4.26111800   | -0.37754800 | 0.02004700  |
| C | 2.77489000   | 1.45340900  | 0.21866200  |
| C | 2.92697200   | 0.06954200  | 0.09658300  |
| C | 1.40387200   | 1.73627600  | 0.16236000  |
| C | 0.71695900   | 0.48883800  | 0.03392600  |
| N | 1.67454000   | -0.52245800 | -0.01217200 |
| C | 0.71191100   | 2.98296800  | 0.11250700  |
| C | -0.71192300  | 2.98296900  | -0.11251100 |
| C | -1.40388300  | 1.73627900  | -0.16240100 |
| C | -0.71696300  | 0.48883700  | -0.03400200 |
| N | 1.24377500   | 4.19262900  | 0.19396800  |
| N | -1.24378700  | 4.19263200  | -0.19394200 |
| C | -2.77489900  | 1.45341000  | -0.21870700 |
| C | -2.92697800  | 0.06954200  | -0.09662200 |
| N | -1.67454600  | -0.52245000 | 0.01213600  |
| C | -5.16351514  | 0.78012848  | -0.12354201 |
| C | -4.26112200  | -0.37755300 | -0.02007900 |
| C | -6.54342000  | 0.20775500  | -0.02985300 |
| C | -6.60280700  | -1.20765500 | 0.13419400  |
| C | -7.82812800  | -1.88148800 | 0.24301200  |
| C | -8.20128900  | -3.20616000 | 0.39636700  |
| C | -9.56946100  | -3.70021100 | 0.49137300  |
| C | -9.49760900  | -5.17774800 | 0.63683000  |
| C | -8.14887300  | -5.56438500 | 0.63180900  |
| C | -7.29401600  | -4.36437600 | 0.48450900  |
| C | -10.48817000 | -6.15302800 | 0.76607700  |
| C | -10.08232000 | -7.47382500 | 0.88453800  |
| C | -8.73500200  | -7.84068400 | 0.87742300  |
| C | -7.74357300  | -6.88321100 | 0.74995900  |
| F | -11.00373800 | -8.43950900 | 1.01049500  |
| F | -8.41950000  | -9.13773600 | 0.99636200  |
| C | -10.75024000 | -2.98164000 | 0.46000500  |
| O | -6.07339600  | -4.36695400 | 0.44510900  |
| C | 12.03141300  | -3.59057600 | -0.56430000 |
| N | 13.08558300  | -4.05915200 | -0.64686400 |
| C | 10.82096900  | -1.56804600 | -0.32169700 |
| N | 10.91010600  | -0.41955600 | -0.20969200 |
| C | 13.80662500  | 12.25104700 | 1.14466200  |
| C | 12.45709900  | 11.53399500 | 1.10546700  |
| C | 12.58630100  | 10.01751600 | 0.94361400  |
| C | 11.24162700  | 9.28874500  | 0.90249100  |
| C | 11.37398400  | 7.77298100  | 0.74019000  |
| C | 10.02989600  | 7.04309700  | 0.69642200  |
| C | 10.16560600  | 5.52788200  | 0.53302300  |

|   |              |             |             |
|---|--------------|-------------|-------------|
| C | 8.82249300   | 4.79667600  | 0.48534700  |
| C | 8.96507100   | 3.28287000  | 0.31984300  |
| C | 7.61869000   | 2.55622000  | 0.26767400  |
| C | 7.79635200   | 1.04759000  | 0.09584100  |
| C | -13.80667700 | 12.25100900 | -1.14461500 |
| C | -12.45714600 | 11.53396200 | -1.10543700 |
| C | -12.58634100 | 10.01748400 | -0.94357400 |
| C | -11.24166400 | 9.28871800  | -0.90246700 |
| C | -11.37401100 | 7.77295500  | -0.74015500 |
| C | -10.02992100 | 7.04307600  | -0.69640400 |
| C | -10.16562300 | 5.52786100  | -0.53299400 |
| C | -8.82250800  | 4.79665900  | -0.48533900 |
| C | -8.96508200  | 3.28285400  | -0.31982300 |
| C | -7.61869900  | 2.55620400  | -0.26767800 |
| C | -7.79635800  | 1.04757600  | -0.09583400 |
| C | -12.03139700 | -3.59060000 | 0.56441200  |
| N | -13.08557000 | -4.05916300 | 0.64700600  |
| C | -10.82096100 | -1.56807100 | 0.32176300  |
| N | -10.91011300 | -0.41958300 | 0.20974100  |
| C | -2.26705800  | -5.44747300 | -0.92411300 |
| C | -1.95734100  | -4.36016500 | 0.10282600  |
| C | -1.83930500  | -2.97282400 | -0.53176900 |
| C | -1.54668900  | -1.89526500 | 0.51351900  |
| C | 2.26708100   | -5.44755400 | 0.92369700  |
| C | 1.95736800   | -4.36016700 | -0.10315900 |
| C | 1.83929500   | -2.97287900 | 0.53154800  |
| C | 1.54669000   | -1.89523900 | -0.51366000 |
| H | 6.69681300   | -7.15947500 | -0.74359700 |
| H | 11.54642900  | -5.94094600 | -0.77887100 |
| H | 8.65301100   | -1.18757900 | -0.19044200 |
| H | -8.65300700  | -1.18759900 | 0.19047000  |
| H | -11.54639900 | -5.94097200 | 0.77900800  |
| H | -6.69677800  | -7.15947900 | 0.74365500  |
| H | 13.68419500  | 13.33177500 | 1.26073100  |
| H | 14.37336500  | 12.07929300 | 0.22386400  |
| H | 14.41975300  | 11.89602800 | 1.97928900  |
| H | 11.85390800  | 11.93447900 | 0.28178200  |
| H | 11.90003000  | 11.75247100 | 2.02450100  |
| H | 13.14508800  | 9.79933500  | 0.02445500  |
| H | 13.19071600  | 9.61713700  | 1.76767700  |
| H | 10.63787700  | 9.68957800  | 0.07834900  |
| H | 10.68335300  | 9.50704500  | 1.82175900  |
| H | 11.93364800  | 7.55501700  | -0.17821200 |
| H | 11.97666800  | 7.37198600  | 1.56491400  |

|   |              |             |             |
|---|--------------|-------------|-------------|
| H | 9.42712100   | 7.44378600  | -0.12845700 |
| H | 9.46990200   | 7.25990200  | 1.61495200  |
| H | 10.72740700  | 5.31120300  | -0.38414600 |
| H | 10.76662600  | 5.12658800  | 1.35856800  |
| H | 8.22111000   | 5.19733000  | -0.34050400 |
| H | 8.26015100   | 5.01091300  | 1.40299400  |
| H | 9.52872100   | 3.06482200  | -0.59475700 |
| H | 9.56283800   | 2.87777500  | 1.14472300  |
| H | 7.03162100   | 2.96073000  | -0.56393500 |
| H | 7.06742500   | 2.76586200  | 1.19073600  |
| H | 8.42162700   | 0.67739400  | 0.91544700  |
| H | 8.38468400   | 0.86996400  | -0.81069200 |
| H | -14.41981600 | 11.89598300 | -1.97923000 |
| H | -14.37340000 | 12.07925900 | -0.22380600 |
| H | -13.68425300 | 13.33173700 | -1.26069400 |
| H | -11.85394400 | 11.93445400 | -0.28176500 |
| H | -11.90009400 | 11.75243500 | -2.02448100 |
| H | -13.14511100 | 9.79930700  | -0.02440500 |
| H | -13.19076800 | 9.61709800  | -1.76762300 |
| H | -10.63790100 | 9.68955900  | -0.07833700 |
| H | -10.68340400 | 9.50701500  | -1.82174500 |
| H | -11.93366100 | 7.55499500  | 0.17825800  |
| H | -11.97670800 | 7.37195300  | -1.56486600 |
| H | -9.42713500  | 7.44377100  | 0.12846200  |
| H | -9.46994200  | 7.25987700  | -1.61494500 |
| H | -10.72740800 | 5.31118600  | 0.38418700  |
| H | -10.76665800 | 5.12656100  | -1.35852600 |
| H | -8.22111200  | 5.19731800  | 0.34050000  |
| H | -8.26018300  | 5.01089200  | -1.40299600 |
| H | -9.52871300  | 3.06481000  | 0.59478800  |
| H | -9.56286400  | 2.87775400  | -1.14469000 |
| H | -7.03161400  | 2.96071900  | 0.56391900  |
| H | -7.06745000  | 2.76584300  | -1.19075100 |
| H | -8.38466900  | 0.86995200  | 0.81071200  |
| H | -8.42164900  | 0.67737700  | -0.91542500 |
| H | -2.33543000  | -6.42946000 | -0.44956000 |
| H | -1.49210900  | -5.50459900 | -1.69503300 |
| H | -3.22159600  | -5.25318000 | -1.42108000 |
| H | -1.02903000  | -4.60349500 | 0.63207900  |
| H | -2.74976100  | -4.34142500 | 0.85844700  |
| H | -1.06502600  | -2.97703500 | -1.30467200 |
| H | -2.77038500  | -2.73395800 | -1.05124300 |
| H | -0.55536800  | -2.00609200 | 0.94010200  |
| H | -2.24750000  | -1.99808700 | 1.34712900  |

|    |             |             |             |
|----|-------------|-------------|-------------|
| H  | 1.49211100  | -5.50476500 | 1.69459100  |
| H  | 2.33549000  | -6.42949900 | 0.44906100  |
| H  | 3.22160100  | -5.25328300 | 1.42070500  |
| H  | 1.02907300  | -4.60346800 | -0.63245300 |
| H  | 2.74980400  | -4.34135100 | -0.85876000 |
| H  | 1.06499300  | -2.97716500 | 1.30442800  |
| H  | 2.77035500  | -2.73404600 | 1.05107100  |
| H  | 0.55537300  | -2.00603600 | -0.94025500 |
| H  | 2.24750900  | -1.99799600 | -1.34727400 |
| Se | -4.46320186 | 2.26401952  | -0.28632999 |
| Se | 4.43764168  | 2.31815512  | 0.29223558  |
| Se | -0.00000800 | 5.27431000  | 0.00003000  |
| S  | -4.98305300 | -1.93670600 | 0.17419800  |
| S  | 4.98305900  | -1.93669500 | -0.17424700 |

Y6-Se-S-Se(B3)

|   |             |             |             |
|---|-------------|-------------|-------------|
| C | 9.49763200  | -5.17772900 | -0.63675600 |
| C | 8.14889800  | -5.56437200 | -0.63175700 |
| C | 7.74360700  | -6.88320200 | -0.74988300 |
| C | 8.73504200  | -7.84067300 | -0.87730500 |
| C | 10.08235900 | -7.47380800 | -0.88440100 |
| C | 10.48820000 | -6.15300700 | -0.76596000 |
| C | 9.56947500  | -3.70019000 | -0.49131900 |
| C | 8.20130100  | -3.20614300 | -0.39634300 |
| C | 7.29403100  | -4.36436000 | -0.48451400 |
| C | 10.75025100 | -2.98161600 | -0.45992800 |
| O | 6.07341300  | -4.36694700 | -0.44510000 |
| C | 7.82813400  | -1.88147200 | -0.24300000 |
| C | 6.60281000  | -1.20764100 | -0.13420900 |
| F | 8.41954700  | -9.13772900 | -0.99622300 |
| F | 11.00378400 | -8.43949300 | -1.01031600 |
| C | 6.54341700  | 0.20776800  | 0.02983700  |
| C | 5.18905632  | 0.72600588  | 0.11757742  |
| C | 4.26111800  | -0.37754800 | 0.02004700  |
| C | 2.77489000  | 1.45340900  | 0.21866200  |
| C | 2.92697200  | 0.06954200  | 0.09658300  |
| C | 1.40387200  | 1.73627600  | 0.16236000  |
| C | 0.71695900  | 0.48883800  | 0.03392600  |
| N | 1.67454000  | -0.52245800 | -0.01217200 |
| C | 0.71191100  | 2.98296800  | 0.11250700  |
| C | -0.71192300 | 2.98296900  | -0.11251100 |
| C | -1.40388300 | 1.73627900  | -0.16240100 |
| C | -0.71696300 | 0.48883700  | -0.03400200 |
| N | 1.24377500  | 4.19262900  | 0.19396800  |

|   |              |             |             |
|---|--------------|-------------|-------------|
| N | -1.24378700  | 4.19263200  | -0.19394200 |
| C | -2.77489900  | 1.45341000  | -0.21870700 |
| C | -2.92697800  | 0.06954200  | -0.09662200 |
| N | -1.67454600  | -0.52245000 | 0.01213600  |
| C | -5.16351514  | 0.78012848  | -0.12354201 |
| C | -4.26112200  | -0.37755300 | -0.02007900 |
| C | -6.54342000  | 0.20775500  | -0.02985300 |
| C | -6.60280700  | -1.20765500 | 0.13419400  |
| C | -7.82812800  | -1.88148800 | 0.24301200  |
| C | -8.20128900  | -3.20616000 | 0.39636700  |
| C | -9.56946100  | -3.70021100 | 0.49137300  |
| C | -9.49760900  | -5.17774800 | 0.63683000  |
| C | -8.14887300  | -5.56438500 | 0.63180900  |
| C | -7.29401600  | -4.36437600 | 0.48450900  |
| C | -10.48817000 | -6.15302800 | 0.76607700  |
| C | -10.08232000 | -7.47382500 | 0.88453800  |
| C | -8.73500200  | -7.84068400 | 0.87742300  |
| C | -7.74357300  | -6.88321100 | 0.74995900  |
| F | -11.00373800 | -8.43950900 | 1.01049500  |
| F | -8.41950000  | -9.13773600 | 0.99636200  |
| C | -10.75024000 | -2.98164000 | 0.46000500  |
| O | -6.07339600  | -4.36695400 | 0.44510900  |
| C | 12.03141300  | -3.59057600 | -0.56430000 |
| N | 13.08558300  | -4.05915200 | -0.64686400 |
| C | 10.82096900  | -1.56804600 | -0.32169700 |
| N | 10.91010600  | -0.41955600 | -0.20969200 |
| C | 13.80662500  | 12.25104700 | 1.14466200  |
| C | 12.45709900  | 11.53399500 | 1.10546700  |
| C | 12.58630100  | 10.01751600 | 0.94361400  |
| C | 11.24162700  | 9.28874500  | 0.90249100  |
| C | 11.37398400  | 7.77298100  | 0.74019000  |
| C | 10.02989600  | 7.04309700  | 0.69642200  |
| C | 10.16560600  | 5.52788200  | 0.53302300  |
| C | 8.82249300   | 4.79667600  | 0.48534700  |
| C | 8.96507100   | 3.28287000  | 0.31984300  |
| C | 7.61869000   | 2.55622000  | 0.26767400  |
| C | 7.79635200   | 1.04759000  | 0.09584100  |
| C | -13.80667700 | 12.25100900 | -1.14461500 |
| C | -12.45714600 | 11.53396200 | -1.10543700 |
| C | -12.58634100 | 10.01748400 | -0.94357400 |
| C | -11.24166400 | 9.28871800  | -0.90246700 |
| C | -11.37401100 | 7.77295500  | -0.74015500 |
| C | -10.02992100 | 7.04307600  | -0.69640400 |
| C | -10.16562300 | 5.52786100  | -0.53299400 |

|   |              |             |             |
|---|--------------|-------------|-------------|
| C | -8.82250800  | 4.79665900  | -0.48533900 |
| C | -8.96508200  | 3.28285400  | -0.31982300 |
| C | -7.61869900  | 2.55620400  | -0.26767800 |
| C | -7.79635800  | 1.04757600  | -0.09583400 |
| C | -12.03139700 | -3.59060000 | 0.56441200  |
| N | -13.08557000 | -4.05916300 | 0.64700600  |
| C | -10.82096100 | -1.56807100 | 0.32176300  |
| N | -10.91011300 | -0.41958300 | 0.20974100  |
| C | -2.26705800  | -5.44747300 | -0.92411300 |
| C | -1.95734100  | -4.36016500 | 0.10282600  |
| C | -1.83930500  | -2.97282400 | -0.53176900 |
| C | -1.54668900  | -1.89526500 | 0.51351900  |
| C | 2.26708100   | -5.44755400 | 0.92369700  |
| C | 1.95736800   | -4.36016700 | -0.10315900 |
| C | 1.83929500   | -2.97287900 | 0.53154800  |
| C | 1.54669000   | -1.89523900 | -0.51366000 |
| H | 6.69681300   | -7.15947500 | -0.74359700 |
| H | 11.54642900  | -5.94094600 | -0.77887100 |
| H | 8.65301100   | -1.18757900 | -0.19044200 |
| H | -8.65300700  | -1.18759900 | 0.19047000  |
| H | -11.54639900 | -5.94097200 | 0.77900800  |
| H | -6.69677800  | -7.15947900 | 0.74365500  |
| H | 13.68419500  | 13.33177500 | 1.26073100  |
| H | 14.37336500  | 12.07929300 | 0.22386400  |
| H | 14.41975300  | 11.89602800 | 1.97928900  |
| H | 11.85390800  | 11.93447900 | 0.28178200  |
| H | 11.90003000  | 11.75247100 | 2.02450100  |
| H | 13.14508800  | 9.79933500  | 0.02445500  |
| H | 13.19071600  | 9.61713700  | 1.76767700  |
| H | 10.63787700  | 9.68957800  | 0.07834900  |
| H | 10.68335300  | 9.50704500  | 1.82175900  |
| H | 11.93364800  | 7.55501700  | -0.17821200 |
| H | 11.97666800  | 7.37198600  | 1.56491400  |
| H | 9.42712100   | 7.44378600  | -0.12845700 |
| H | 9.46990200   | 7.25990200  | 1.61495200  |
| H | 10.72740700  | 5.31120300  | -0.38414600 |
| H | 10.76662600  | 5.12658800  | 1.35856800  |
| H | 8.22111000   | 5.19733000  | -0.34050400 |
| H | 8.26015100   | 5.01091300  | 1.40299400  |
| H | 9.52872100   | 3.06482200  | -0.59475700 |
| H | 9.56283800   | 2.87777500  | 1.14472300  |
| H | 7.03162100   | 2.96073000  | -0.56393500 |
| H | 7.06742500   | 2.76586200  | 1.19073600  |
| H | 8.42162700   | 0.67739400  | 0.91544700  |

|    |              |             |             |
|----|--------------|-------------|-------------|
| H  | 8.38468400   | 0.86996400  | -0.81069200 |
| H  | -14.41981600 | 11.89598300 | -1.97923000 |
| H  | -14.37340000 | 12.07925900 | -0.22380600 |
| H  | -13.68425300 | 13.33173700 | -1.26069400 |
| H  | -11.85394400 | 11.93445400 | -0.28176500 |
| H  | -11.90009400 | 11.75243500 | -2.02448100 |
| H  | -13.14511100 | 9.79930700  | -0.02440500 |
| H  | -13.19076800 | 9.61709800  | -1.76762300 |
| H  | -10.63790100 | 9.68955900  | -0.07833700 |
| H  | -10.68340400 | 9.50701500  | -1.82174500 |
| H  | -11.93366100 | 7.55499500  | 0.17825800  |
| H  | -11.97670800 | 7.37195300  | -1.56486600 |
| H  | -9.42713500  | 7.44377100  | 0.12846200  |
| H  | -9.46994200  | 7.25987700  | -1.61494500 |
| H  | -10.72740800 | 5.31118600  | 0.38418700  |
| H  | -10.76665800 | 5.12656100  | -1.35852600 |
| H  | -8.22111200  | 5.19731800  | 0.34050000  |
| H  | -8.26018300  | 5.01089200  | -1.40299600 |
| H  | -9.52871300  | 3.06481000  | 0.59478800  |
| H  | -9.56286400  | 2.87775400  | -1.14469000 |
| H  | -7.03161400  | 2.96071900  | 0.56391900  |
| H  | -7.06745000  | 2.76584300  | -1.19075100 |
| H  | -8.38466900  | 0.86995200  | 0.81071200  |
| H  | -8.42164900  | 0.67737700  | -0.91542500 |
| H  | -2.33543000  | -6.42946000 | -0.44956000 |
| H  | -1.49210900  | -5.50459900 | -1.69503300 |
| H  | -3.22159600  | -5.25318000 | -1.42108000 |
| H  | -1.02903000  | -4.60349500 | 0.63207900  |
| H  | -2.74976100  | -4.34142500 | 0.85844700  |
| H  | -1.06502600  | -2.97703500 | -1.30467200 |
| H  | -2.77038500  | -2.73395800 | -1.05124300 |
| H  | -0.55536800  | -2.00609200 | 0.94010200  |
| H  | -2.24750000  | -1.99808700 | 1.34712900  |
| H  | 1.49211100   | -5.50476500 | 1.69459100  |
| H  | 2.33549000   | -6.42949900 | 0.44906100  |
| H  | 3.22160100   | -5.25328300 | 1.42070500  |
| H  | 1.02907300   | -4.60346800 | -0.63245300 |
| H  | 2.74980400   | -4.34135100 | -0.85876000 |
| H  | 1.06499300   | -2.97716500 | 1.30442800  |
| H  | 2.77035500   | -2.73404600 | 1.05107100  |
| H  | 0.55537300   | -2.00603600 | -0.94025500 |
| H  | 2.24750900   | -1.99799600 | -1.34727400 |
| Se | -0.00000800  | 5.27431000  | 0.00003000  |
| S  | -4.46320186  | 2.26401952  | -0.28632999 |

|    |             |             |             |
|----|-------------|-------------|-------------|
| S  | 4.43764168  | 2.31815512  | 0.29223558  |
| Se | -4.98305300 | -1.93670600 | 0.17419800  |
| Se | 4.98305900  | -1.93669500 | -0.17424700 |

Y6-Se-Se-Se(B4)

|   |             |             |             |
|---|-------------|-------------|-------------|
| C | 9.49763200  | -5.17772900 | -0.63675600 |
| C | 8.14889800  | -5.56437200 | -0.63175700 |
| C | 7.74360700  | -6.88320200 | -0.74988300 |
| C | 8.73504200  | -7.84067300 | -0.87730500 |
| C | 10.08235900 | -7.47380800 | -0.88440100 |
| C | 10.48820000 | -6.15300700 | -0.76596000 |
| C | 9.56947500  | -3.70019000 | -0.49131900 |
| C | 8.20130100  | -3.20614300 | -0.39634300 |
| C | 7.29403100  | -4.36436000 | -0.48451400 |
| C | 10.75025100 | -2.98161600 | -0.45992800 |
| O | 6.07341300  | -4.36694700 | -0.44510000 |
| C | 7.82813400  | -1.88147200 | -0.24300000 |
| C | 6.60281000  | -1.20764100 | -0.13420900 |
| F | 8.41954700  | -9.13772900 | -0.99622300 |
| F | 11.00378400 | -8.43949300 | -1.01031600 |
| C | 6.54341700  | 0.20776800  | 0.02983700  |
| C | 5.18905632  | 0.72600588  | 0.11757742  |
| C | 4.26111800  | -0.37754800 | 0.02004700  |
| C | 2.77489000  | 1.45340900  | 0.21866200  |
| C | 2.92697200  | 0.06954200  | 0.09658300  |
| C | 1.40387200  | 1.73627600  | 0.16236000  |
| C | 0.71695900  | 0.48883800  | 0.03392600  |
| N | 1.67454000  | -0.52245800 | -0.01217200 |
| C | 0.71191100  | 2.98296800  | 0.11250700  |
| C | -0.71192300 | 2.98296900  | -0.11251100 |
| C | -1.40388300 | 1.73627900  | -0.16240100 |
| C | -0.71696300 | 0.48883700  | -0.03400200 |
| N | 1.24377500  | 4.19262900  | 0.19396800  |
| N | -1.24378700 | 4.19263200  | -0.19394200 |
| C | -2.77489900 | 1.45341000  | -0.21870700 |
| C | -2.92697800 | 0.06954200  | -0.09662200 |
| N | -1.67454600 | -0.52245000 | 0.01213600  |
| C | -5.16351514 | 0.78012848  | -0.12354201 |
| C | -4.26112200 | -0.37755300 | -0.02007900 |
| C | -6.54342000 | 0.20775500  | -0.02985300 |
| C | -6.60280700 | -1.20765500 | 0.13419400  |
| C | -7.82812800 | -1.88148800 | 0.24301200  |
| C | -8.20128900 | -3.20616000 | 0.39636700  |
| C | -9.56946100 | -3.70021100 | 0.49137300  |



|   |              |             |             |
|---|--------------|-------------|-------------|
| C | -9.49760900  | -5.17774800 | 0.63683000  |
| C | -8.14887300  | -5.56438500 | 0.63180900  |
| C | -7.29401600  | -4.36437600 | 0.48450900  |
| C | -10.48817000 | -6.15302800 | 0.76607700  |
| C | -10.08232000 | -7.47382500 | 0.88453800  |
| C | -8.73500200  | -7.84068400 | 0.87742300  |
| C | -7.74357300  | -6.88321100 | 0.74995900  |
| F | -11.00373800 | -8.43950900 | 1.01049500  |
| F | -8.41950000  | -9.13773600 | 0.99636200  |
| C | -10.75024000 | -2.98164000 | 0.46000500  |
| O | -6.07339600  | -4.36695400 | 0.44510900  |
| C | 12.03141300  | -3.59057600 | -0.56430000 |
| N | 13.08558300  | -4.05915200 | -0.64686400 |
| C | 10.82096900  | -1.56804600 | -0.32169700 |
| N | 10.91010600  | -0.41955600 | -0.20969200 |
| C | 13.80662500  | 12.25104700 | 1.14466200  |
| C | 12.45709900  | 11.53399500 | 1.10546700  |
| C | 12.58630100  | 10.01751600 | 0.94361400  |
| C | 11.24162700  | 9.28874500  | 0.90249100  |
| C | 11.37398400  | 7.77298100  | 0.74019000  |
| C | 10.02989600  | 7.04309700  | 0.69642200  |
| C | 10.16560600  | 5.52788200  | 0.53302300  |
| C | 8.82249300   | 4.79667600  | 0.48534700  |
| C | 8.96507100   | 3.28287000  | 0.31984300  |
| C | 7.61869000   | 2.55622000  | 0.26767400  |
| C | 7.79635200   | 1.04759000  | 0.09584100  |
| C | -13.80667700 | 12.25100900 | -1.14461500 |
| C | -12.45714600 | 11.53396200 | -1.10543700 |
| C | -12.58634100 | 10.01748400 | -0.94357400 |
| C | -11.24166400 | 9.28871800  | -0.90246700 |
| C | -11.37401100 | 7.77295500  | -0.74015500 |
| C | -10.02992100 | 7.04307600  | -0.69640400 |
| C | -10.16562300 | 5.52786100  | -0.53299400 |
| C | -8.82250800  | 4.79665900  | -0.48533900 |
| C | -8.96508200  | 3.28285400  | -0.31982300 |
| C | -7.61869900  | 2.55620400  | -0.26767800 |
| C | -7.79635800  | 1.04757600  | -0.09583400 |
| C | -12.03139700 | -3.59060000 | 0.56441200  |
| N | -13.08557000 | -4.05916300 | 0.64700600  |
| C | -10.82096100 | -1.56807100 | 0.32176300  |
| N | -10.91011300 | -0.41958300 | 0.20974100  |
| C | -2.26705800  | -5.44747300 | -0.92411300 |
| C | -1.95734100  | -4.36016500 | 0.10282600  |
| C | -1.83930500  | -2.97282400 | -0.53176900 |

|   |              |             |             |
|---|--------------|-------------|-------------|
| C | -1.54668900  | -1.89526500 | 0.51351900  |
| C | 2.26708100   | -5.44755400 | 0.92369700  |
| C | 1.95736800   | -4.36016700 | -0.10315900 |
| C | 1.83929500   | -2.97287900 | 0.53154800  |
| C | 1.54669000   | -1.89523900 | -0.51366000 |
| H | 6.69681300   | -7.15947500 | -0.74359700 |
| H | 11.54642900  | -5.94094600 | -0.77887100 |
| H | 8.65301100   | -1.18757900 | -0.19044200 |
| H | -8.65300700  | -1.18759900 | 0.19047000  |
| H | -11.54639900 | -5.94097200 | 0.77900800  |
| H | -6.69677800  | -7.15947900 | 0.74365500  |
| H | 13.68419500  | 13.33177500 | 1.26073100  |
| H | 14.37336500  | 12.07929300 | 0.22386400  |
| H | 14.41975300  | 11.89602800 | 1.97928900  |
| H | 11.85390800  | 11.93447900 | 0.28178200  |
| H | 11.90003000  | 11.75247100 | 2.02450100  |
| H | 13.14508800  | 9.79933500  | 0.02445500  |
| H | 13.19071600  | 9.61713700  | 1.76767700  |
| H | 10.63787700  | 9.68957800  | 0.07834900  |
| H | 10.68335300  | 9.50704500  | 1.82175900  |
| H | 11.93364800  | 7.55501700  | -0.17821200 |
| H | 11.97666800  | 7.37198600  | 1.56491400  |
| H | 9.42712100   | 7.44378600  | -0.12845700 |
| H | 9.46990200   | 7.25990200  | 1.61495200  |
| H | 10.72740700  | 5.31120300  | -0.38414600 |
| H | 10.76662600  | 5.12658800  | 1.35856800  |
| H | 8.22111000   | 5.19733000  | -0.34050400 |
| H | 8.26015100   | 5.01091300  | 1.40299400  |
| H | 9.52872100   | 3.06482200  | -0.59475700 |
| H | 9.56283800   | 2.87777500  | 1.14472300  |
| H | 7.03162100   | 2.96073000  | -0.56393500 |
| H | 7.06742500   | 2.76586200  | 1.19073600  |
| H | 8.42162700   | 0.67739400  | 0.91544700  |
| H | 8.38468400   | 0.86996400  | -0.81069200 |
| H | -14.41981600 | 11.89598300 | -1.97923000 |
| H | -14.37340000 | 12.07925900 | -0.22380600 |
| H | -13.68425300 | 13.33173700 | -1.26069400 |
| H | -11.85394400 | 11.93445400 | -0.28176500 |
| H | -11.90009400 | 11.75243500 | -2.02448100 |
| H | -13.14511100 | 9.79930700  | -0.02440500 |
| H | -13.19076800 | 9.61709800  | -1.76762300 |
| H | -10.63790100 | 9.68955900  | -0.07833700 |
| H | -10.68340400 | 9.50701500  | -1.82174500 |
| H | -11.93366100 | 7.55499500  | 0.17825800  |

|    |              |             |             |
|----|--------------|-------------|-------------|
| H  | -11.97670800 | 7.37195300  | -1.56486600 |
| H  | -9.42713500  | 7.44377100  | 0.12846200  |
| H  | -9.46994200  | 7.25987700  | -1.61494500 |
| H  | -10.72740800 | 5.31118600  | 0.38418700  |
| H  | -10.76665800 | 5.12656100  | -1.35852600 |
| H  | -8.22111200  | 5.19731800  | 0.34050000  |
| H  | -8.26018300  | 5.01089200  | -1.40299600 |
| H  | -9.52871300  | 3.06481000  | 0.59478800  |
| H  | -9.56286400  | 2.87775400  | -1.14469000 |
| H  | -7.03161400  | 2.96071900  | 0.56391900  |
| H  | -7.06745000  | 2.76584300  | -1.19075100 |
| H  | -8.38466900  | 0.86995200  | 0.81071200  |
| H  | -8.42164900  | 0.67737700  | -0.91542500 |
| H  | -2.33543000  | -6.42946000 | -0.44956000 |
| H  | -1.49210900  | -5.50459900 | -1.69503300 |
| H  | -3.22159600  | -5.25318000 | -1.42108000 |
| H  | -1.02903000  | -4.60349500 | 0.63207900  |
| H  | -2.74976100  | -4.34142500 | 0.85844700  |
| H  | -1.06502600  | -2.97703500 | -1.30467200 |
| H  | -2.77038500  | -2.73395800 | -1.05124300 |
| H  | -0.55536800  | -2.00609200 | 0.94010200  |
| H  | -2.24750000  | -1.99808700 | 1.34712900  |
| H  | 1.49211100   | -5.50476500 | 1.69459100  |
| H  | 2.33549000   | -6.42949900 | 0.44906100  |
| H  | 3.22160100   | -5.25328300 | 1.42070500  |
| H  | 1.02907300   | -4.60346800 | -0.63245300 |
| H  | 2.74980400   | -4.34135100 | -0.85876000 |
| H  | 1.06499300   | -2.97716500 | 1.30442800  |
| H  | 2.77035500   | -2.73404600 | 1.05107100  |
| H  | 0.55537300   | -2.00603600 | -0.94025500 |
| H  | 2.24750900   | -1.99799600 | -1.34727400 |
| Se | -4.46320186  | 2.26401952  | -0.28632999 |
| Se | 4.43764168   | 2.31815512  | 0.29223558  |
| Se | -4.98305300  | -1.93670600 | 0.17419800  |
| Se | 4.98305900   | -1.93669500 | -0.17424700 |
| Se | -0.00000800  | 5.27431000  | 0.00003000  |
